# Supplementary material
Source: PubMed Central journal article supplement (PMC3800985)
Supplement: 1309839110_sapp.pdf [file 1309839110_sapp.pdf]

Loss of Metabotropic Glutamate Receptor 2 Escalates Alcohol Consumption: Genomic Discovery and  
Functional Validation

## **Supporting Information**

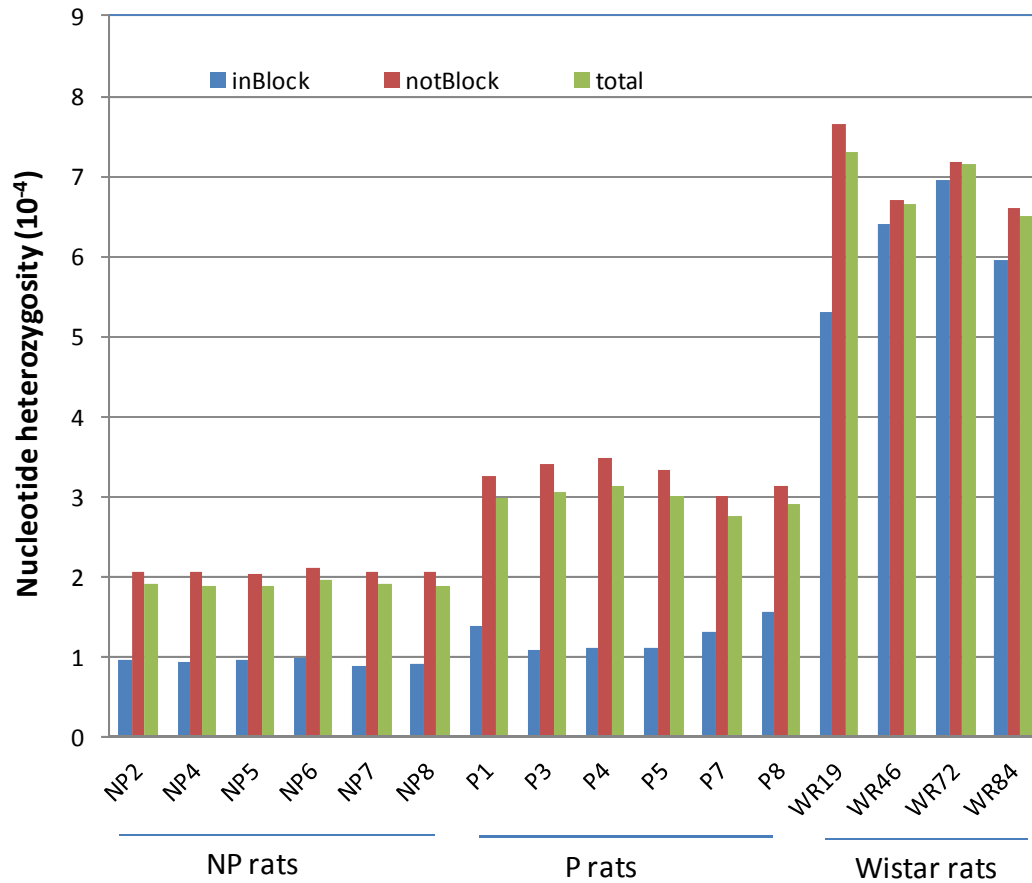

Figure S1. Nucleotide heterozygosity in P, NP, and Wistar rats showing overall genetic fixation in P and NP rats and genetic fixation occurring in large genomic blocks. The fixation is attributable to both inbreeding and selection. The heterozygosities are calculated using sequences of all bases covered by exome sequencing and presented as heterozygous bases per  $10^4$  nucleotides. The average heterozygosities in all regions, in large fixed blocks, and in regions outside the large blocks are coded as green, blue, and red respectively. As shown in Supplemental 2, the large fixed blocks tend to be fixed in opposite configuration in P and NP rats.

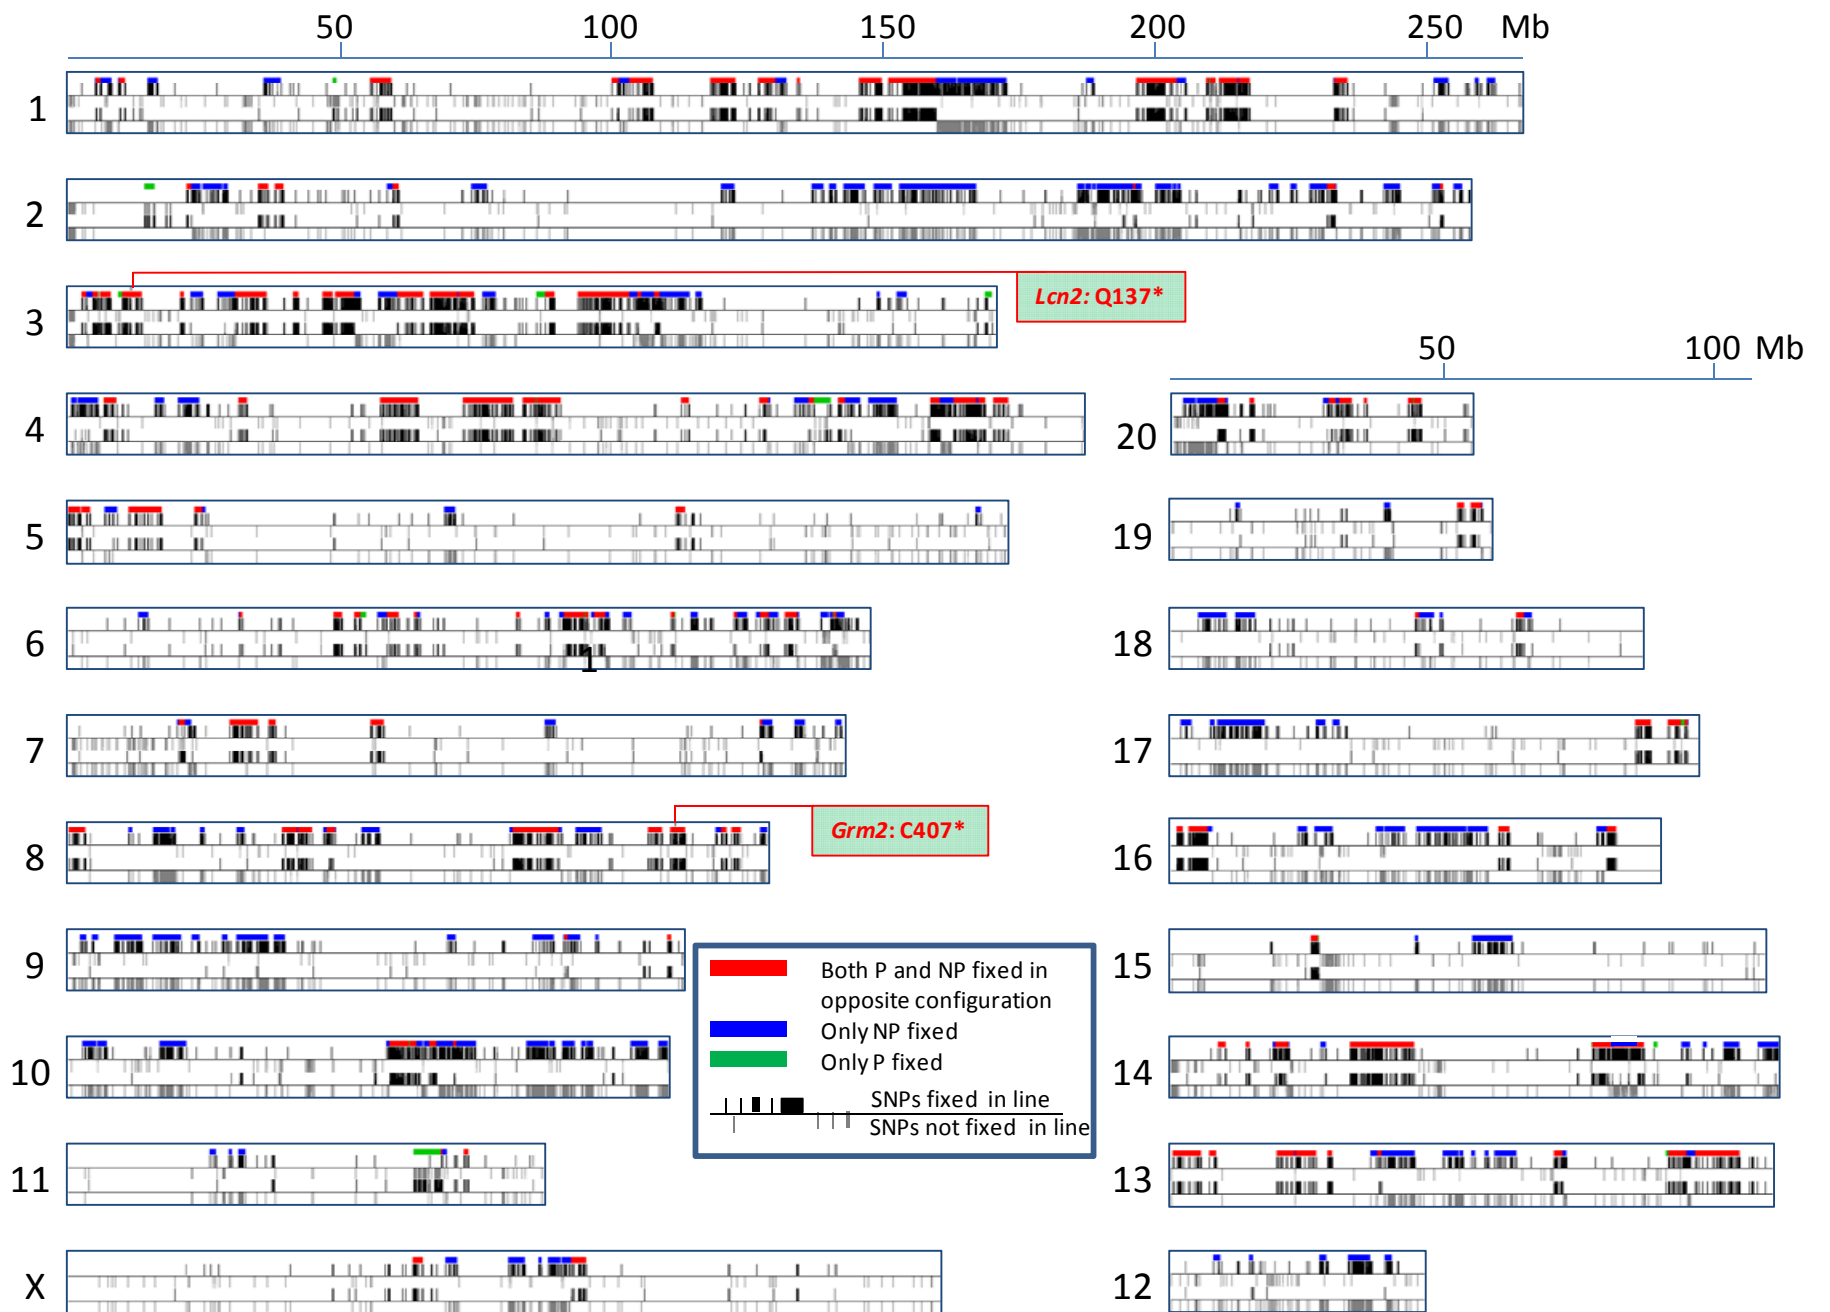

Figure S2. Distributions of SNPs and their allelic segregation between P and NP rats across the genome. All SNPs (vertical lines) that are either fixed (upward) or not fixed (downward) in NP (upper horizontal line) and P rats (lower horizontal line) are marked at their positions on each chromosome. Genomic regions containing SNPs that are fixed in both P and NP and in opposite allelic configurations are highlighted in red, those fixed in NP are in blue, and those fixed in P are in green. The locations of two stop codon variants, *Grm2* C407\* and *Lcn2* Q137\* are highlighted, and both are located in large blocks fixed in opposite configuration.

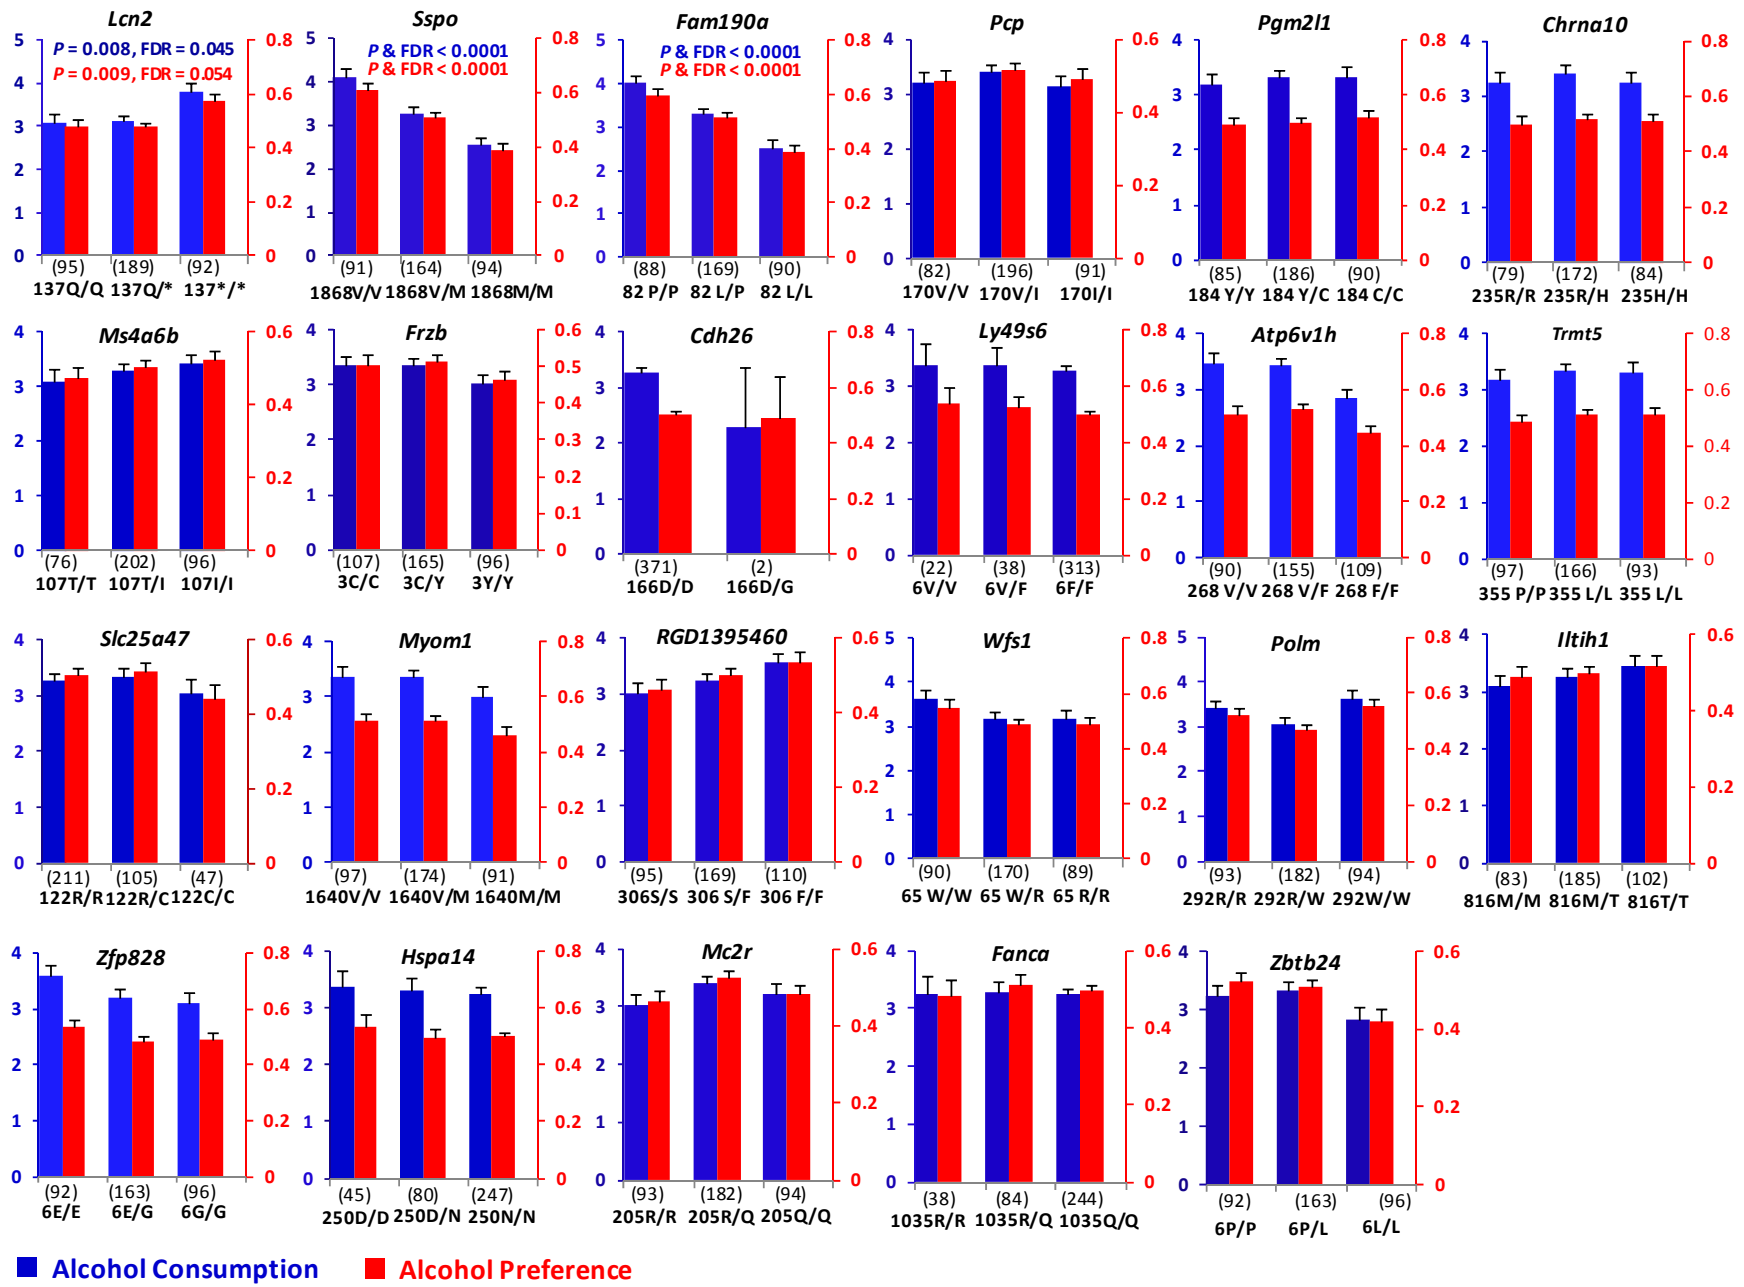

Figure S3. QTL analysis of nonsense (see main paper for *Grm2* C407\*) and missense variants for alcohol consumption and preference in F2 rats. The 22 missense variants evaluated for linkage were all predicted to affect protein function. The left Y axis represents alcohol consumption (g/kg body weight/day) and the right Y axis represents alcohol preference (ethanol/total fluid) for each genotype group. The numbers of F2 rats in each genotype group are shown in parentheses. Comparisons were analyzed by one-way ANOVA and FDR (Benjamini) was calculated for multiple testing correction.

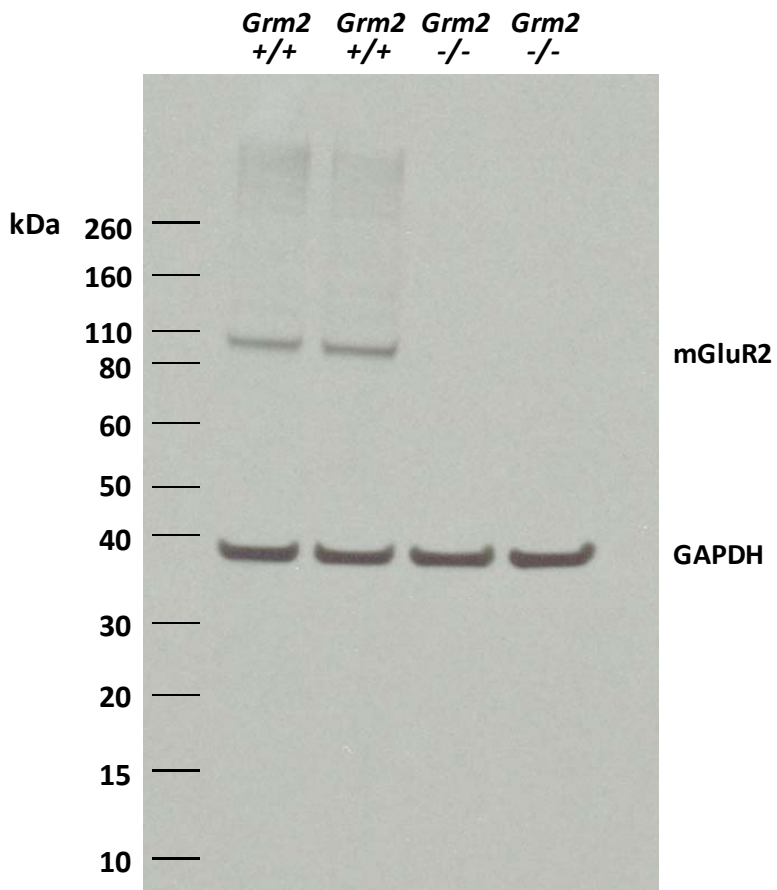

Figure S4. Western blot of hippocampal mGluR2 protein in *Grm2*<sup>+/+</sup> and *Grm2*<sup>-/-</sup> mice. A mouse monoclonal anti-mGluR2 N-terminal antibody (ab15672, Abcam) was used. A GAPDH antibody (MAB374, Millipore) was used as control. Two individual *Grm2*<sup>+/+</sup> and *Grm2*<sup>-/-</sup> mice in each group were analyzed.

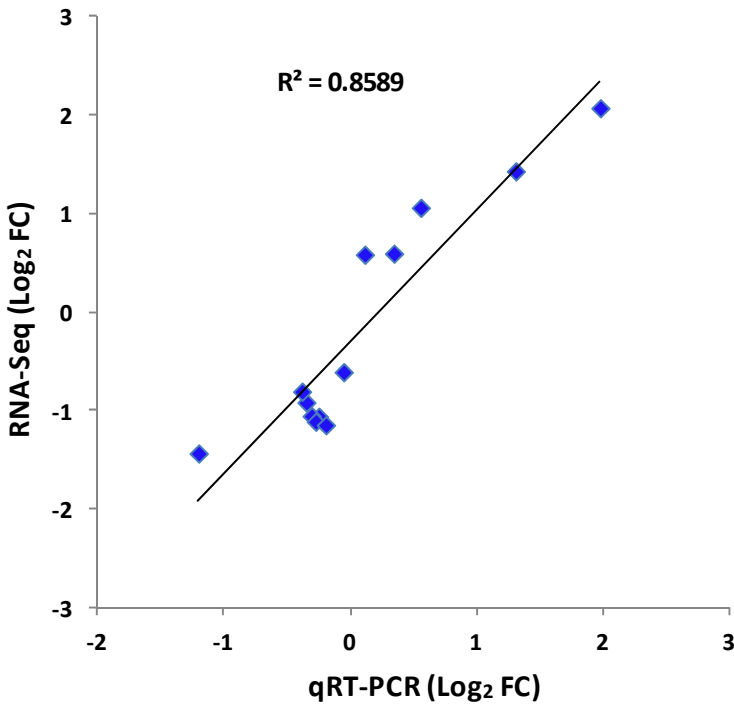

| Gene Symbol    | RNAseq (Log <sub>2</sub> FC) | qRT-PCR (Log <sub>2</sub> FC) |
|----------------|------------------------------|-------------------------------|
| <i>Slit1</i>   | 1.44                         | 1.31                          |
| <i>Syn1</i>    | -0.79                        | -0.38                         |
| <i>Gsta4</i>   | -1.42                        | -1.20                         |
| <i>Gabra3</i>  | 0.60                         | 0.11                          |
| <i>Gabbr1</i>  | -0.91                        | -0.35                         |
| <i>Slc6a1</i>  | -0.60                        | -0.05                         |
| <i>Akr1b10</i> | 1.07                         | 0.56                          |
| <i>Atp2b2</i>  | -1.04                        | -0.31                         |
| <i>Gria4</i>   | 0.61                         | 0.34                          |
| <i>Nrxn2</i>   | -1.10                        | -0.27                         |
| <i>Thrsp</i>   | -1.13                        | -0.19                         |
| <i>Nrgn</i>    | -1.05                        | -0.25                         |
| <i>Vegfb</i>   | 2.08                         | 1.98                          |

Figure S5. Correlation between RNA-Seq and qRT-PCR measures of differential hippocampal gene expression in P and NP rats. The log<sub>2</sub> based fold differences in RNA levels (P vs. NP) were measured for 13 genes by qRT-PCR and RNA-Seq. The numerical values are listed in the table on right.



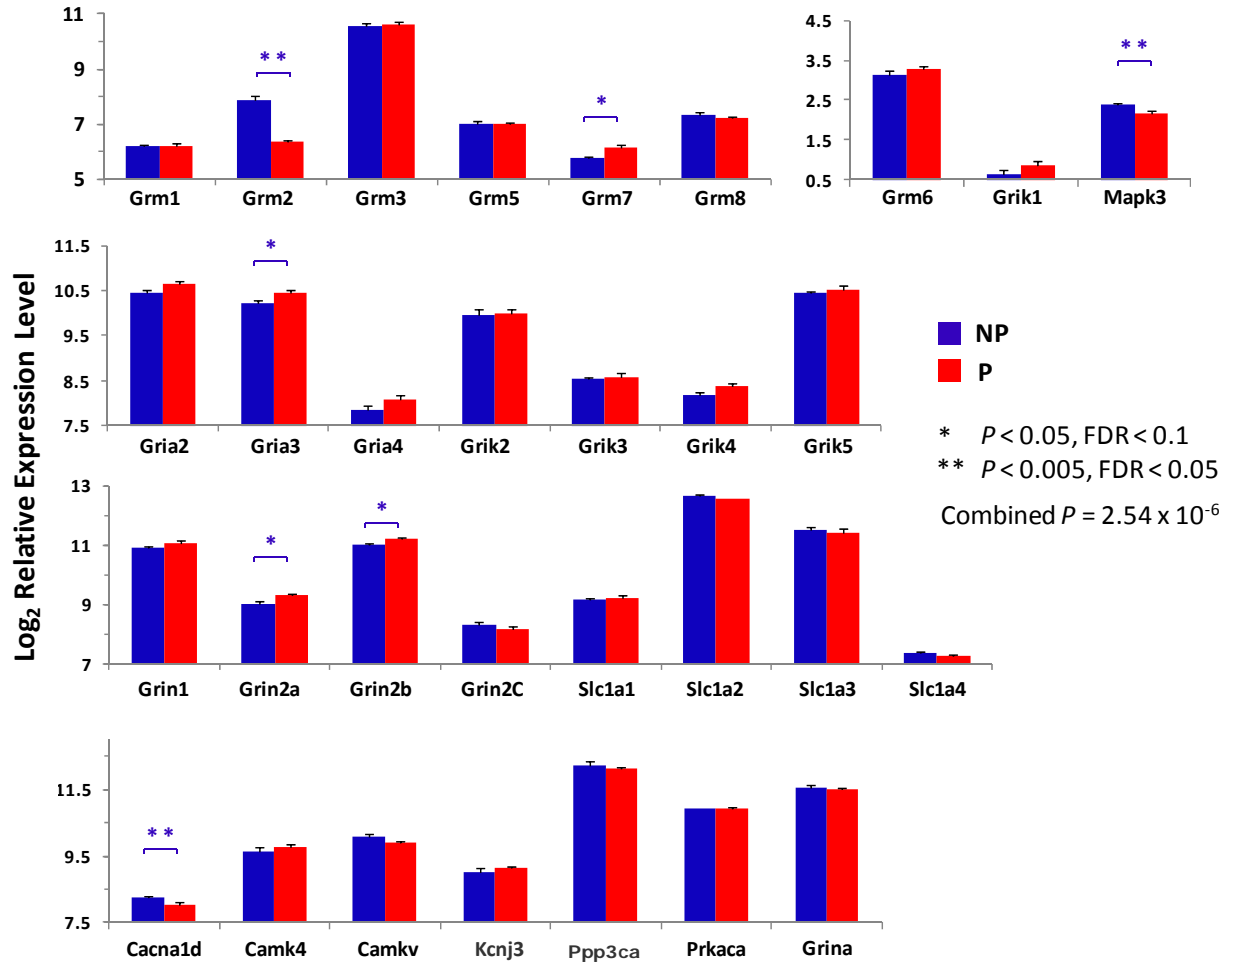

Figure S6. Expression of genes involved in synaptic glutamatergic functions in the striatum of P and NP rats. Total RNA extracted from striatum was reverse transcribed and quantified by PCR. Log<sub>2</sub> relative expression levels were analyzed by one-way ANOVA. Genes that were differentially expressed between P and NP rats are indicated ( $P < 0.05$  or  $P < 0.005$ ). The combined  $P$  value ( $p = 2.54 \times 10^{-6}$ ) was calculated using the Truncated Product Method (Zaykin, D.V. et al. *Genetic Epidemiology* **22**, 170-185, 2002).

Table S1. Distributions of SNVs with homozygously segregating alleles between P and NP rats

|                                     | Number of Segregating SNPs | Number of Genes Containing Segregating SNPs |
|-------------------------------------|----------------------------|---------------------------------------------|
| CDS                                 | 2579                       | 1068                                        |
| Synonymous                          | 2204                       | 1107                                        |
| Missense                            | 879                        | 495                                         |
| Affect Functions*                   | 36                         | 33                                          |
| Non-sense                           | 2                          | 2                                           |
| UTR                                 | 608                        | 424                                         |
| Near Splicing Site (within 10 n.t.) | 550                        | 417                                         |
| Intron                              | 10752                      | 1672                                        |
| Upstream (1 kb)                     | 408                        | 264                                         |
| Downstream (1 kb)                   | 213                        | 144                                         |
| Intergenic                          | 10840                      |                                             |

Table S2. Nonsense and missense variants segregating between P and NP rats and predicted to affect protein functions

| Chr | post      | Ref Base | Alt Base | Gene Symbol      | Gene Name                                                  | Transcript   | Amino Acid Sub | Rat with Alt Allele | Polyphen    |       | SIFT        |       | QTL Analysis <sup>¶</sup> |
|-----|-----------|----------|----------|------------------|------------------------------------------------------------|--------------|----------------|---------------------|-------------|-------|-------------|-------|---------------------------|
|     |           |          |          |                  |                                                            |              |                |                     | Prediction* | Prob  | Prediction  | Score |                           |
| 3   | 11512622  | G        | A        | <i>Lcn2</i>      | Lipocalin2                                                 | NM_130741    | Q137*          | P                   |             |       |             |       | Y                         |
| 8   | 111844799 | G        | T        | <i>Grm2</i>      | Glutamate receptor, metabotropic 2                         | NM_001105711 | C407*          | P                   |             |       |             |       | Y                         |
| 1   | 149749858 | G        | A        | <i>Prcp</i>      | Lysosomal Pro-X carboxypeptidase precursor                 | NM_001106281 | V170I          | NP                  | Poss Dam    | 0.827 | Deleterious | 0.02  | Y                         |
| 1   | 157634616 | A        | G        | <i>Pgm2l1</i>    | Glucose 1,6-bisphosphate synthase                          | NM_001109454 | Y184C          | NP                  | Prob Dam    | 0.999 | Deleterious | 0     | Y                         |
| 1   | 157812662 | C        | T        | <i>C2cd3</i>     | C2 domain-containing protein 3                             | NM_001191602 | S212F          | NP                  | Prob Dam    | 0.992 | Deleterious | 0.05  |                           |
| 1   | 159592812 | C        | T        | <i>Chrna10</i>   | Neuronal acetylcholine receptor subunit alpha-10 precursor | NM_022639    | R235H          | NP                  | Prob Dam    | 1     | Deleterious | 0.01  | Y                         |
| 1   | 214017149 | C        | T        | <i>Ms4a2</i>     | High affinity immunoglobulin epsilon receptor subunit beta | NM_012845    | P213L          | P                   | Poss Dam    | 0.454 | Deleterious | 0.02  |                           |
| 1   | 214214271 | G        | A        | <i>Ms4a6b</i>    | Membrane-spanning 4-domains subfamily A member 6B          | NM_001006975 | T107I          | P                   | Poss Dam    | 0.742 | Deleterious | 0.01  | Y                         |
| 1   | 233681974 | G        | A        | <i>Il33</i>      | Interleukin-33 precursor                                   | NM_001014166 | G171S          | P                   | Prob Dam    | 0.963 | Deleterious | 0.03  |                           |
| 3   | 10029374  | C        | T        | <i>Dyt1</i>      | Torsin-1A precursor                                        | NM_153303    | G179S          | NP                  | Prob Dam    | 1     | Deleterious | 0.03  |                           |
| 3   | 63382438  | C        | T        | <i>Frzb</i>      | Secreted frizzled-related protein 3 precursor              | NM_001100527 | C3Y            | NP                  | Poss Dam    | 0.827 | Deleterious | 0.02  | Y                         |
| 3   | 167547084 | A        | G        | <i>Cdh26</i>     | Cadherin-like protein 26 precursor                         | NM_001191745 | D166G          | P                   | Prob Dam    | 1     | Deleterious | 0.01  | Y                         |
| 4   | 76550783  | G        | A        | <i>Sspo</i>      | SCO-spondin precursor                                      | NM_001007016 | V1868M         | NP                  | Prob Dam    | 0.98  | Deleterious | 0.01  | Y                         |
| 4   | 77105531  | G        | C        | <i>Svs1</i>      | Seminal vesicle-secreted protein I precursor               | NM_199095    | G214R          | NP                  | Prob Dam    | 0.984 | Deleterious | 0     |                           |
| 4   | 78888170  | A        | G        | <i>Npvf</i>      | Fmrfamide-related peptides precursor                       | NM_023952    | L153S          | NP                  | Prob Dam    | 0.999 | Deleterious | 0     |                           |
| 4   | 87347648  | C        | T        | <i>LOC500148</i> | Similar to 40S ribosomal protein S7 (S8)                   | NM_001035253 | D35N           | NP                  | Prob Dam    | 0.992 | Deleterious | 0     |                           |
| 4   | 90254140  | C        | T        | <i>Fam190a</i>   | Protein FAM190A                                            | NM_001134622 | P82L           | NP                  | Prob Dam    | 0.958 | Deleterious | 0     | Y                         |
| 4   | 167956645 | C        | A        | <i>Ly49s6</i>    | Ly49 stimulatory receptor 6                                | NM_001009488 | V6F            | P                   | Prob Dam    | 0.998 | Deleterious | 0.02  | Y                         |

|    |           |   |   |                 |                                                        |              |        |    |          |       |             |      |   |
|----|-----------|---|---|-----------------|--------------------------------------------------------|--------------|--------|----|----------|-------|-------------|------|---|
| 5  | 14621693  | C | A | <i>Atp6v1h</i>  | V-type proton ATPase subunit H                         | NM_001013929 | V268F  | NP | Poss Dam | 0.845 | Deleterious | 0.03 | Y |
| 6  | 95709737  | G | A | <i>Trmt5</i>    | Trna (guanine-N(1)-methyltransferase                   | NM_001108713 | P355L  | NP | Prob Dam | 0.967 | Deleterious | 0.01 | Y |
| 6  | 133196293 | C | T | <i>Slc25a47</i> | Solute carrier family 25 member 47                     | NM_001001509 | R122C  | P  | Prob Dam | 1     | Deleterious | 0    | Y |
| 9  | 110340396 | G | A | <i>Myom1</i>    | Myomesin-1 isoform 1                                   | NM_001191584 | V1640M | P  | Prob Dam | 1     | Deleterious | 0    | Y |
| 14 | 33108957  | C | T | <i>RDG1359</i>  |                                                        | NM_001006959 | S306F  | P  | Prob Dam | 0.976 | Deleterious | 0.01 | Y |
| 14 | 33113513  | G | A | <i>RDG1359</i>  |                                                        | NM_001006959 | G536R  | NP | Prob Dam | 0.959 | Deleterious | 0.02 |   |
| 14 | 79387445  | T | C | <i>Wfs1</i>     | Wolframin                                              | NM_031823    | W65R   | P  | Poss Dam | 0.948 | Deleterious | 0.1  | Y |
| 14 | 86493947  | G | A | <i>Polm</i>     | DNA-directed DNA/RNA polymerase mu                     | NM_001011912 | R292W  | P  | Prob Dam | 1     | Deleterious | 0    | Y |
| 16 | 6365006   | A | G | <i>Itih1</i>    | Inter-alpha-trypsin inhibitor heavy chain H1 precursor | NM_001107291 | M816T  | P  | Prob Dam | 0.988 | Deleterious | 0.02 | Y |
| 16 | 80573644  | T | C | <i>Zfp828</i>   | Zinc finger protein 828                                | NM_001107329 | E6G    | NP | Prob Dam | 0.992 | Deleterious | 0.04 | Y |
| 17 | 85862715  | G | A | <i>Hspa14</i>   | Heat shock 70 kda protein 14 isoform 1                 | NM_001004257 | D250N  | NP | Poss Dam | 0.756 | Deleterious | 0    | Y |
| 18 | 63896710  | T | C | <i>Cidea</i>    | Cell death activator CIDE-A                            | NM_001170467 | F214S  | P  | Poss Dam | 0.454 | Deleterious | 0.01 |   |
| 18 | 64601568  | G | A | <i>Mc2r</i>     | Adrenocorticotrophic hormone receptor                  | NM_001100491 | R205Q  | NP | Poss Dam | 0.517 | Deleterious | 0.04 | Y |
| 19 | 53589560  | C | T | <i>Fanca</i>    | Fanconi anemia group A protein homolog                 | NM_001108455 | R1035Q | NP | Prob Dam | 0.999 | Deleterious | 0.03 | Y |
| 20 | 45410281  | C | T | <i>Zbtb24</i>   | Zinc finger and BTB domain-containing protein 24       | NM_001098667 | P6L    | NP | Prob Dam | 0.958 | Deleterious | 0    | Y |

\*Prob Dam = Probably damaging; Poss Dam = Possibly damaging. ¶ Y = yes. Genomic positions refer to Baylor 3.4/rn4

Table S3. Differentially Expressed (FDR &lt; 0.05) Genes in the Hippocampus of P and NP Rats

| Gene Symbol  | Gene Name                                                                                                                | Ave Exp Level | Log2 FC (P/NP) | P value | FDR     |
|--------------|--------------------------------------------------------------------------------------------------------------------------|---------------|----------------|---------|---------|
| Fam111a      | Family with sequence similarity 111, member A                                                                            | 3.37          | 4.54           | 2.6E-16 | 2.9E-12 |
| Mpeg1        | Macrophage expressed gene 1                                                                                              | 3.41          | -2.19          | 6.8E-13 | 3.8E-09 |
| Vegfb        | Vascular endothelial growth factor B                                                                                     | 3.45          | 2.08           | 1.1E-12 | 4.1E-09 |
| Plac9        | Placenta-specific 9                                                                                                      | 2.64          | 2.21           | 9.3E-12 | 2.7E-08 |
| LOC501110    | Similar to Glutathione S-transferase A1 (GTH1) (HA subunit 1) (GST-epsilon) (GSTA1-1) (GST class-alpha)                  | 2.14          | 2.62           | 8.4E-10 | 1.9E-06 |
| Thrsp        | Thyroid hormone responsive                                                                                               | 4.50          | -1.13          | 2.3E-09 | 4.4E-06 |
| Fbp2         | Fructose-1,6-bisphosphatase 2                                                                                            | 0.59          | 0.91           | 7.0E-08 | 1.1E-04 |
| Slit1        | Slit homolog 1 (Drosophila)                                                                                              | 3.46          | 1.44           | 9.2E-08 | 1.3E-04 |
| Gsta4        | Glutathione S-transferase alpha 4                                                                                        | 3.38          | -1.42          | 4.2E-07 | 5.3E-04 |
| Necap1       | NECAP endocytosis associated 1                                                                                           | 6.45          | -0.77          | 5.7E-07 | 6.6E-04 |
| Ccdc50       | Coiled-coil domain containing 50                                                                                         | 6.38          | -0.83          | 1.2E-06 | 1.3E-03 |
| Dcn          | Decorin                                                                                                                  | 4.04          | 1.42           | 1.3E-06 | 1.3E-03 |
| Abcb1b       | ATP-binding cassette, sub-family B (MDR/TAP), member 1B                                                                  | 3.05          | 1.44           | 2.6E-06 | 2.2E-03 |
| Zmiz1        | Zinc finger, MIZ-type containing 1                                                                                       | 4.32          | -1.01          | 3.3E-06 | 2.7E-03 |
| Ms4a2        | Membrane-spanning 4-domains, subfamily A, member 2 (Fc fragment of ige, high affinity I, receptor for; beta polypeptide) | 0.70          | 0.89           | 3.6E-06 | 2.8E-03 |
| Bace1        | Beta-site APP cleaving enzyme 1                                                                                          | 5.03          | 0.85           | 4.3E-06 | 3.1E-03 |
| Chchd2       | Coiled-coil-helix-coiled-coil-helix domain containing 2                                                                  | 3.95          | 2.14           | 4.6E-06 | 3.1E-03 |
| Immt         | Inner membrane protein, mitochondrial                                                                                    | 5.59          | 0.88           | 5.9E-06 | 3.7E-03 |
| Akr1b10      | Aldo-keto reductase family 1, member B10 (aldose reductase)                                                              | 3.05          | 1.07           | 6.2E-06 | 3.7E-03 |
| Centg2       | Arfgap with gtpase domain, ankyrin repeat and PH domain 1                                                                | 4.22          | -0.82          | 7.0E-06 | 4.0E-03 |
| Aebp1        | AE binding protein 1                                                                                                     | 2.88          | -1.09          | 7.8E-06 | 4.2E-03 |
| Arf4         | ADP-ribosylation factor 4                                                                                                | 6.17          | 0.77           | 8.3E-06 | 4.3E-03 |
| Slc35d3      | Solute carrier family 35, member D3                                                                                      | 1.74          | -1.28          | 8.9E-06 | 4.3E-03 |
| Pter         | Phosphotriesterase related                                                                                               | 2.07          | -0.87          | 9.1E-06 | 4.3E-03 |
| Trappc2      | Trafficking protein particle complex 2                                                                                   | 6.53          | 1.02           | 1.1E-05 | 5.1E-03 |
| Gas2         | Growth arrest-specific 2                                                                                                 | 2.18          | 1.06           | 1.6E-05 | 6.6E-03 |
| LOC100134871 | Beta globin minor gene                                                                                                   | 0.58          | 0.89           | 1.6E-05 | 6.6E-03 |
| Pgam1        | Phosphoglycerate mutase 1 (brain)                                                                                        | 2.59          | 0.87           | 1.8E-05 | 7.3E-03 |
| Riok2        | RIO kinase 2 (yeast)                                                                                                     | 4.45          | 0.89           | 2.1E-05 | 8.3E-03 |

|            |                                                                              |      |       |         |         |
|------------|------------------------------------------------------------------------------|------|-------|---------|---------|
| Psmg1      | Proteasome (prosome, macropain) assembly chaperone 1                         | 4.63 | 0.77  | 2.7E-05 | 9.7E-03 |
| Serpina3n  | Serine (or cysteine) peptidase inhibitor, clade A, member 3N                 | 0.93 | -1.15 | 2.7E-05 | 9.7E-03 |
| Sptb       | Spectrin, beta, erythrocytic                                                 | 5.70 | -0.83 | 2.7E-05 | 9.7E-03 |
| Camkv      | Cam kinase-like vesicle-associated                                           | 7.68 | 0.63  | 2.8E-05 | 9.7E-03 |
| Bscl2      | Bernardinelli-Seip congenital lipodystrophy 2 homolog                        | 4.20 | -0.85 | 3.0E-05 | 9.9E-03 |
| Depdc7     | DEP domain containing 7                                                      | 2.73 | 0.79  | 3.2E-05 | 1.1E-02 |
| Camta2     | Calmodulin binding transcription activator 2                                 | 6.13 | -0.94 | 3.7E-05 | 1.2E-02 |
| Mfap3l     | Microfibrillar-associated protein 3-like                                     | 6.95 | -0.69 | 3.9E-05 | 1.2E-02 |
| Taf9       | TAF9 RNA polymerase II, TATA box binding protein (TBP)-associated factor     | 5.00 | 0.65  | 4.5E-05 | 1.3E-02 |
| RGD1306284 | Similar to RIKEN cdna 1110005A03                                             | 2.67 | 0.83  | 4.7E-05 | 1.3E-02 |
| Asam       | Adipocyte-specific adhesion molecule                                         | 4.46 | -0.78 | 4.9E-05 | 1.3E-02 |
| Trim8      | Tripartite motif-containing 8                                                | 5.58 | -0.94 | 5.0E-05 | 1.3E-02 |
| Ehd3       | EH-domain containing 3                                                       | 5.05 | -1.46 | 5.3E-05 | 1.3E-02 |
| Sptbn2     | Spectrin, beta, non-erythrocytic 2                                           | 7.24 | -0.71 | 5.4E-05 | 1.3E-02 |
| Synpo      | Synaptopodin                                                                 | 3.29 | -0.81 | 5.6E-05 | 1.3E-02 |
| Syn1       | Synapsin I                                                                   | 6.09 | -0.79 | 5.7E-05 | 1.3E-02 |
| Nomo1      | Nodal modulator 1                                                            | 5.67 | -0.80 | 5.8E-05 | 1.3E-02 |
| Cog2       | Component of oligomeric golgi complex 2                                      | 4.93 | 0.57  | 6.0E-05 | 1.3E-02 |
| Atp5c1     | ATP synthase, H+ transporting, mitochondrial F1 complex, gamma polypeptide 1 | 6.85 | 0.57  | 6.1E-05 | 1.3E-02 |
| Pak6       | P21 protein (Cdc42/Rac)-activated kinase 6                                   | 3.53 | -1.01 | 6.1E-05 | 1.3E-02 |
| Incenp     | Inner centromere protein                                                     | 2.68 | -0.89 | 6.2E-05 | 1.3E-02 |
| Fgf2       | Fibroblast growth factor 2                                                   | 2.71 | -0.60 | 6.3E-05 | 1.3E-02 |
| Add2       | Adducin 2 (beta)                                                             | 5.27 | -0.90 | 6.3E-05 | 1.3E-02 |
| Snrpb      | Small nuclear ribonucleoprotein polypeptides B and B1                        | 5.62 | 0.70  | 6.4E-05 | 1.3E-02 |
| Eml1       | Echinoderm microtubule associated protein like 1                             | 2.59 | -0.96 | 6.6E-05 | 1.3E-02 |
| Atp5o      | ATP synthase, H+ transporting, mitochondrial F1 complex, O subunit           | 7.61 | 0.60  | 6.7E-05 | 1.3E-02 |
| Scaf1      | SR-related CTD-associated factor 1                                           | 6.08 | -1.12 | 6.9E-05 | 1.3E-02 |
| Hsbp1      | Heat shock factor binding protein 1                                          | 7.06 | 0.89  | 6.9E-05 | 1.3E-02 |
| Myh7       | Myosin, heavy chain 7, cardiac muscle, beta                                  | 2.02 | -0.99 | 6.9E-05 | 1.3E-02 |
| Ppp2r2d    | Protein phosphatase 2, regulatory subunit B, delta isoform                   | 5.85 | 0.89  | 6.9E-05 | 1.3E-02 |
| Pex5l      | Peroxisomal biogenesis factor 5-like                                         | 5.24 | -0.70 | 7.4E-05 | 1.4E-02 |
| Itpkc      | Inositol 1,4,5-trisphosphate 3-kinase C                                      | 2.40 | -0.57 | 7.4E-05 | 1.4E-02 |
| Wdr45l     | Wdr45 like                                                                   | 4.58 | 0.79  | 7.5E-05 | 1.4E-02 |

|            |                                                                                 |      |       |         |         |
|------------|---------------------------------------------------------------------------------|------|-------|---------|---------|
| Gjd2       | Gap junction protein, delta 2                                                   | 3.03 | 0.87  | 8.0E-05 | 1.4E-02 |
| Afaf       | Acrosome formation associated factor                                            | 1.10 | 1.01  | 8.0E-05 | 1.4E-02 |
| Zfp365     | Zinc finger protein 365                                                         | 6.20 | -0.85 | 8.4E-05 | 1.5E-02 |
| Rpl23a     | Ribosomal protein l23a                                                          | 5.25 | 0.76  | 8.5E-05 | 1.5E-02 |
| Dlg4       | Discs, large homolog 4 (Drosophila)                                             | 5.66 | -0.81 | 8.6E-05 | 1.5E-02 |
| Ociad1     | OCIA domain containing 1                                                        | 6.67 | 0.59  | 8.7E-05 | 1.5E-02 |
| Zdhhc2     | Zinc finger, DHHC-type containing 2                                             | 4.33 | 0.83  | 8.8E-05 | 1.5E-02 |
| Atp5g3     | ATP synthase, H+ transporting, mitochondrial F0 complex, subunit C3 (subunit 9) | 6.10 | 0.86  | 9.1E-05 | 1.5E-02 |
| Cacna1i    | Calcium channel, voltage-dependent, T type, alpha 1I subunit                    | 2.83 | -0.77 | 9.4E-05 | 1.5E-02 |
| Lysmd2     | Lysm, putative peptidoglycan-binding, domain containing 2                       | 3.95 | 0.79  | 9.4E-05 | 1.5E-02 |
| RGD1562351 | Similar to chromosome 7 open reading frame 23                                   | 1.99 | 0.65  | 9.5E-05 | 1.5E-02 |
| Ddn        | Dendrin                                                                         | 9.27 | -0.83 | 9.8E-05 | 1.5E-02 |
| Ctnnal1    | Catenin (cadherin associated protein), alpha-like 1                             | 4.25 | 0.74  | 9.8E-05 | 1.5E-02 |
| Skp1       | S-phase kinase-associated protein 1                                             | 9.27 | 0.57  | 9.9E-05 | 1.5E-02 |
| Mfsd2      | Major facilitator superfamily domain containing 2                               | 3.81 | 0.82  | 1.0E-04 | 1.5E-02 |
| Rcn2       | Reticulocalbin 2, EF-hand calcium binding domain                                | 5.96 | 0.66  | 1.0E-04 | 1.5E-02 |
| Fam36a     | Family with sequence similarity 36, member A                                    | 4.38 | 0.67  | 1.0E-04 | 1.5E-02 |
| Grin2b     | Glutamate receptor, ionotropic, N-methyl D-aspartate 2B                         | 4.76 | -0.74 | 1.1E-04 | 1.5E-02 |
| Atp2b2     | Atpase, Ca++ transporting, plasma membrane 2                                    | 6.23 | -1.04 | 1.1E-04 | 1.5E-02 |
| Wash2      | WAS protein family homolog 2                                                    | 3.37 | -0.68 | 1.1E-04 | 1.5E-02 |
| Paqr8      | Progesterin and adipog receptor family member VIII                              | 6.31 | -0.62 | 1.1E-04 | 1.5E-02 |
| Ucp3       | Uncoupling protein 3 (mitochondrial, proton carrier)                            | 0.51 | -0.76 | 1.1E-04 | 1.5E-02 |
| Grm2       | Glutamate receptor, metabotropic 2                                              | 1.87 | -0.73 | 1.1E-04 | 1.5E-02 |
| Freq       | Frequenin homolog (Drosophila)                                                  | 6.67 | -0.89 | 1.1E-04 | 1.5E-02 |
| Gdap1      | Ganglioside-induced differentiation-associated-protein 1                        | 5.67 | 0.59  | 1.1E-04 | 1.5E-02 |
| Bpnt1      | 3'(2'), 5'-bisphosphate nucleotidase 1                                          | 5.62 | 1.13  | 1.1E-04 | 1.5E-02 |
| Lmbrd1     | LMBR1 domain containing 1                                                       | 6.68 | 0.72  | 1.2E-04 | 1.5E-02 |
| Prss23     | Protease, serine, 23                                                            | 4.08 | -0.60 | 1.2E-04 | 1.5E-02 |
| Tapbpl     | TAP binding protein-like                                                        | 2.36 | -0.83 | 1.2E-04 | 1.5E-02 |
| RGD1566130 | Similar to mkiaa1940 protein                                                    | 3.89 | -0.78 | 1.2E-04 | 1.5E-02 |

|           |                                                              |      |       |         |         |
|-----------|--------------------------------------------------------------|------|-------|---------|---------|
| H2afz     | H2A histone family, member Z                                 | 4.90 | 1.03  | 1.2E-04 | 1.5E-02 |
| Ppp1r9b   | Protein phosphatase 1, regulatory subunit 9B                 | 8.02 | -0.62 | 1.2E-04 | 1.5E-02 |
| Prdx1     | Peroxiredoxin 1                                              | 3.09 | 0.82  | 1.2E-04 | 1.5E-02 |
| Tmem41b   | Transmembrane protein 41B                                    | 4.62 | 0.73  | 1.3E-04 | 1.5E-02 |
| Ophn1     | Oligophrenin 1                                               | 3.69 | 0.69  | 1.3E-04 | 1.5E-02 |
| LOC498685 | Similar to UPF0308 protein c9orf21                           | 2.64 | 0.92  | 1.3E-04 | 1.5E-02 |
| Psmc6     | Proteasome (prosome, macropain) 26S subunit, atpase, 6       | 7.16 | 0.57  | 1.3E-04 | 1.5E-02 |
| Slc17a5   | Solute carrier family 17 (anion/sugar transporter), member 5 | 4.07 | 0.87  | 1.4E-04 | 1.5E-02 |
| Tmem119   | Transmembrane protein 119                                    | 2.02 | -0.72 | 1.4E-04 | 1.6E-02 |
| Mtx2      | Metaxin 2                                                    | 4.84 | 0.95  | 1.4E-04 | 1.6E-02 |
| Lrrc20    | Leucine rich repeat containing 20                            | 2.27 | 0.89  | 1.4E-04 | 1.6E-02 |
| Scn7a     | Sodium channel, voltage-gated, type VII, alpha               | 1.62 | 0.96  | 1.4E-04 | 1.6E-02 |
| Cdk5r2    | Cyclin-dependent kinase 5, regulatory subunit 2 (p39)        | 3.15 | -0.86 | 1.5E-04 | 1.7E-02 |
| Trim41    | Tripartite motif-containing 41                               | 4.99 | -0.80 | 1.5E-04 | 1.7E-02 |
| Vamp2     | Vesicle-associated membrane protein 2 (synaptobrevin 2)      | 8.66 | -1.01 | 1.6E-04 | 1.7E-02 |
| Clic2     | Chloride intracellular channel 2                             | 1.38 | 0.70  | 1.6E-04 | 1.7E-02 |
| Irf2bp1   | Interferon regulatory factor 2 binding protein 1             | 3.11 | -0.99 | 1.6E-04 | 1.7E-02 |
| Kcnj6     | Potassium inwardly-rectifying channel, subfamily J, member 6 | 5.65 | -0.59 | 1.7E-04 | 1.8E-02 |
| Cmc1      | COX assembly mitochondrial protein homolog (S. Cerevisiae)   | 3.05 | -0.79 | 1.7E-04 | 1.8E-02 |
| Memo1     | Mediator of cell motility 1                                  | 4.18 | 0.83  | 1.8E-04 | 1.8E-02 |
| Ndufc2    | NADH dehydrogenase (ubiquinone) 1, subcomplex unknown, 2     | 6.12 | 0.63  | 1.8E-04 | 1.8E-02 |
| Ccl6      | Chemokine (C-C motif) ligand 6                               | 0.64 | 0.79  | 1.8E-04 | 1.8E-02 |
| Man2a2    | Mannosidase 2, alpha 2                                       | 3.75 | -0.81 | 1.9E-04 | 1.9E-02 |
| Rarres2   | Retinoic acid receptor responder (tazarotene induced) 2      | 3.19 | -0.88 | 1.9E-04 | 1.9E-02 |
| Glrx5     | Glutaredoxin 5                                               | 5.41 | -0.79 | 1.9E-04 | 1.9E-02 |
| Slco2b1   | Solute carrier organic anion transporter family, member 2b1  | 3.71 | -0.77 | 2.0E-04 | 1.9E-02 |
| RT1-N1    | RT1 class Ib, locus N1                                       | 1.09 | 1.92  | 2.1E-04 | 1.9E-02 |
| RT1-N2    |                                                              | 1.09 | 1.92  | 2.1E-04 | 1.9E-02 |
| Mmp15     | Matrix metalloproteinase 15                                  | 3.03 | -0.97 | 2.1E-04 | 1.9E-02 |
| Pdzd11    | PDZ domain containing 11                                     | 4.12 | 0.71  | 2.1E-04 | 1.9E-02 |
| Imp3      | IMP3, U3 small nucleolar ribonucleoprotein, homolog (yeast)  | 3.04 | 0.70  | 2.2E-04 | 1.9E-02 |



|            |                                                                        |      |       |         |         |
|------------|------------------------------------------------------------------------|------|-------|---------|---------|
| Pcdhgb7    | Protocadherin gamma subfamily B, 7                                     | 5.77 | -1.04 | 2.2E-04 | 1.9E-02 |
| RGD1311946 | Similar to RIKEN cdna 1810055G02                                       | 2.72 | -0.90 | 2.2E-04 | 1.9E-02 |
| Pcdhga1    | Protocadherin gamma subfamily A, 1                                     | 5.74 | -1.10 | 2.3E-04 | 1.9E-02 |
| Pcdhga10   | Protocadherin gamma subfamily A, 10                                    | 5.74 | -1.10 | 2.3E-04 | 1.9E-02 |
| Pcdhga11   | Protocadherin gamma subfamily A, 11                                    | 5.74 | -1.10 | 2.3E-04 | 1.9E-02 |
| Pcdhga12   | Protocadherin gamma subfamily A, 12                                    | 5.74 | -1.10 | 2.3E-04 | 1.9E-02 |
| Pcdhga2    | Protocadherin gamma subfamily A, 2                                     | 5.74 | -1.10 | 2.3E-04 | 1.9E-02 |
| Pcdhga3    | Protocadherin gamma subfamily A, 3                                     | 5.74 | -1.10 | 2.3E-04 | 1.9E-02 |
| Pcdhga5    | Protocadherin gamma subfamily A, 5                                     | 5.74 | -1.10 | 2.3E-04 | 1.9E-02 |
| Pcdhga7    | Protocadherin gamma subfamily A, 7                                     | 5.74 | -1.10 | 2.3E-04 | 1.9E-02 |
| Pcdhga8    | Protocadherin gamma subfamily A, 8                                     | 5.74 | -1.10 | 2.3E-04 | 1.9E-02 |
| Pcdhga9    | Protocadherin gamma subfamily A, 9                                     | 5.74 | -1.10 | 2.3E-04 | 1.9E-02 |
| Pcdhgb8    | Protocadherin gamma subfamily B, 8                                     | 5.74 | -1.10 | 2.3E-04 | 1.9E-02 |
| Pcdhgc3    | Protocadherin gamma subfamily C, 3                                     | 5.74 | -1.10 | 2.3E-04 | 1.9E-02 |
| Rbm9       | RNA binding motif protein 9                                            | 5.50 | -0.58 | 2.3E-04 | 1.9E-02 |
| RT1-CE14   | RT1 class I, locus CE14                                                | 1.14 | 1.11  | 2.3E-04 | 1.9E-02 |
| Drg1       | Developmentally regulated GTP binding protein 1                        | 4.63 | 0.67  | 2.3E-04 | 1.9E-02 |
| Lsm5       | LSM5 homolog, U6 small nuclear RNA associated ( <i>S. Cerevisiae</i> ) | 3.37 | 1.06  | 2.4E-04 | 1.9E-02 |
| Taok2      | TAO kinase 2                                                           | 4.37 | -0.62 | 2.4E-04 | 1.9E-02 |
| Angel2     | Angel homolog 2 ( <i>Drosophila</i> )                                  | 5.59 | 0.70  | 2.4E-04 | 1.9E-02 |
| Slc48a1    | Solute carrier family 48 (heme transporter), member 1                  | 4.67 | -0.75 | 2.4E-04 | 1.9E-02 |
| Sort1      | Sortilin 1                                                             | 7.77 | -0.96 | 2.4E-04 | 1.9E-02 |
| Rps7       | Ribosomal protein S7                                                   | 5.47 | -1.09 | 2.4E-04 | 1.9E-02 |
| Bsn        | Bassoon                                                                | 5.86 | -0.89 | 2.5E-04 | 1.9E-02 |
| Dpysl5     | Dihydropyrimidinase-like 5                                             | 2.60 | -0.81 | 2.5E-04 | 1.9E-02 |
| Gabbr1     | Gamma-aminobutyric acid (GABA) B receptor 1                            | 8.02 | -0.91 | 2.6E-04 | 2.0E-02 |
| Pcdhgc5    | Protocadherin gamma c5                                                 | 5.64 | -1.16 | 2.6E-04 | 2.0E-02 |
| Snx14      | Sorting nexin 14                                                       | 4.95 | 0.63  | 2.6E-04 | 2.0E-02 |
| Plau       | Plasminogen activator, urokinase                                       | 0.73 | 0.73  | 2.7E-04 | 2.0E-02 |
| Mobk13     | MOB1, Mps One Binder kinase activator-like 3 (yeast)                   | 6.24 | 0.88  | 2.7E-04 | 2.0E-02 |
| Srp19      | Signal recognition particle 19                                         | 4.07 | 0.60  | 2.8E-04 | 2.1E-02 |
| Pls3       | Plastin 3 (T-isoform)                                                  | 6.36 | 0.53  | 2.8E-04 | 2.1E-02 |
| Tmem22     | Transmembrane protein 22                                               | 3.64 | 0.67  | 2.9E-04 | 2.1E-02 |
| Psm10      | Proteasome (prosome, macropain) 26S subunit, non-atpase, 10            | 3.20 | 0.72  | 3.0E-04 | 2.1E-02 |
| Ndn        | Necdin homolog (mouse)                                                 | 5.24 | 0.54  | 3.0E-04 | 2.1E-02 |

|            |                                                               |      |       |         |         |
|------------|---------------------------------------------------------------|------|-------|---------|---------|
| MGC94199   | Similar to RIKEN cdna 2610301B20; EST AI428449                | 5.54 | 0.85  | 3.0E-04 | 2.1E-02 |
| Gatad2b    | GATA zinc finger domain containing 2B                         | 4.41 | -0.65 | 3.0E-04 | 2.1E-02 |
| Tusc3      | Tumor suppressor candidate 3                                  | 4.78 | 1.01  | 3.1E-04 | 2.1E-02 |
| Thumpd2    | THUMP domain containing 2                                     | 2.70 | 0.83  | 3.1E-04 | 2.1E-02 |
| Rfk        | Riboflavin kinase                                             | 2.16 | 0.96  | 3.1E-04 | 2.1E-02 |
| LOC501038  | Ab2-060                                                       | 3.49 | -0.95 | 3.1E-04 | 2.2E-02 |
| Kcnj11     | Potassium inwardly rectifying channel, subfamily J, member 11 | 2.63 | -0.87 | 3.2E-04 | 2.2E-02 |
| Adrbk1     | Adrenergic, beta, receptor kinase 1                           | 5.68 | -0.92 | 3.2E-04 | 2.2E-02 |
| Ndufab1    | NADH dehydrogenase (ubiquinone) 1, alpha/beta subcomplex, 1   | 7.19 | 0.57  | 3.2E-04 | 2.2E-02 |
| Dock5      | Dedicator of cytokinesis 5                                    | 2.73 | 0.63  | 3.3E-04 | 2.2E-02 |
| Impa1      | Inositol (myo)-1(or 4)-monophosphatase 1                      | 5.14 | 0.63  | 3.3E-04 | 2.2E-02 |
| Gins1      | GINS complex subunit 1 (Psf1 homolog)                         | 0.71 | 0.68  | 3.3E-04 | 2.2E-02 |
| Map2k4     | Mitogen activated protein kinase kinase 4                     | 5.62 | 0.50  | 3.4E-04 | 2.3E-02 |
| Slc31a1    | Solute carrier family 31 (copper transporters), member 1      | 2.92 | 0.69  | 3.5E-04 | 2.3E-02 |
| LOC691431  | Similar to mitochondrial carrier protein MGC4399              | 3.49 | 0.73  | 3.6E-04 | 2.3E-02 |
| Cno        | Cappuccino homolog (mouse)                                    | 2.76 | 0.68  | 3.6E-04 | 2.3E-02 |
| Dscr3      | Down syndrome critical region gene 3                          | 1.97 | 0.53  | 3.6E-04 | 2.4E-02 |
| Wdr61      | WD repeat domain 61                                           | 5.01 | 0.54  | 3.7E-04 | 2.4E-02 |
| Cct5       | Chaperonin containing Tcp1, subunit 5 (epsilon)               | 7.18 | 0.54  | 3.7E-04 | 2.4E-02 |
| Oprm1      | Opioid receptor, mu 1                                         | 1.91 | 0.76  | 3.7E-04 | 2.4E-02 |
| Anxa11     | Annexin A11                                                   | 4.69 | -0.93 | 3.8E-04 | 2.4E-02 |
| Sec22a     | SEC22 vesicle trafficking protein homolog A (S. Cerevisiae)   | 3.46 | 0.83  | 3.9E-04 | 2.4E-02 |
| Rnh1       | Ribonuclease/angiogenin inhibitor 1                           | 3.69 | 0.72  | 3.9E-04 | 2.4E-02 |
| Mrpl3      | Mitochondrial ribosomal protein L3                            | 4.12 | 0.50  | 4.0E-04 | 2.5E-02 |
| RGD1562218 | Similar to RIKEN cdna 0610039J04                              | 4.36 | -0.71 | 4.0E-04 | 2.5E-02 |
| Riok3      | RIO kinase 3 (yeast)                                          | 6.38 | 0.80  | 4.0E-04 | 2.5E-02 |
| Btf3       | Basic transcription factor 3                                  | 4.92 | 0.63  | 4.0E-04 | 2.5E-02 |
| Ncbp1      | Nuclear cap binding protein subunit 1, 80kda                  | 5.93 | 0.56  | 4.1E-04 | 2.5E-02 |
| Gja1       | Gap junction protein, alpha 1                                 | 7.71 | -0.49 | 4.2E-04 | 2.6E-02 |
| Pno1       | Partner of NOB1 homolog (S. Cerevisiae)                       | 4.36 | 0.73  | 4.4E-04 | 2.7E-02 |
| Slc30a3    | Solute carrier family 30 (zinc transporter), member 3         | 4.27 | -1.19 | 4.6E-04 | 2.8E-02 |
| Tp53       | Tumor protein p53                                             | 2.28 | -0.64 | 4.6E-04 | 2.8E-02 |
| Phf15      | PHD finger protein 15                                         | 3.67 | -0.67 | 4.6E-04 | 2.8E-02 |
| Hs2st1     | Heparan sulfate 2-O-sulfotransferase 1                        | 5.02 | -0.71 | 4.7E-04 | 2.8E-02 |

|            |                                                                       |      |       |         |         |
|------------|-----------------------------------------------------------------------|------|-------|---------|---------|
| Plekhb1    | Pleckstrin homology domain containing, family B (evectins) member 1   | 8.26 | -0.77 | 4.7E-04 | 2.8E-02 |
| Prr18      | Proline rich region 18                                                | 4.28 | -0.53 | 4.7E-04 | 2.8E-02 |
| Kcna6      | Potassium voltage gated channel, shaker related subfamily, member 6   | 4.13 | -0.63 | 4.7E-04 | 2.8E-02 |
| Terf2ip    | Telomeric repeat binding factor 2, interacting protein                | 5.27 | 0.56  | 4.9E-04 | 2.8E-02 |
| RGD1565584 | Similar to tyrosine kinase-associated leucine zipper protein lazipii  | 4.71 | 0.85  | 5.0E-04 | 2.9E-02 |
| Rab14      | RAB14, member RAS oncogene family                                     | 5.45 | 0.58  | 5.1E-04 | 2.9E-02 |
| Rad1       | RAD1 homolog (S. Pombe)                                               | 1.89 | 0.72  | 5.1E-04 | 2.9E-02 |
| Tmem178    | Transmembrane protein 178                                             | 7.27 | -1.13 | 5.1E-04 | 2.9E-02 |
| Upf3a      | UPF3 regulator of nonsense transcripts homolog A (yeast)              | 4.81 | -0.54 | 5.1E-04 | 2.9E-02 |
| Chrm4      | Cholinergic receptor, muscarinic 4                                    | 2.19 | -0.77 | 5.1E-04 | 2.9E-02 |
| Mylip      | Myosin regulatory light chain interacting protein                     | 3.77 | -0.55 | 5.1E-04 | 2.9E-02 |
| Tbkbp1     | TBK1 binding protein 1                                                | 3.65 | -0.51 | 5.2E-04 | 2.9E-02 |
| Jun        | Jun oncogene                                                          | 6.39 | -0.81 | 5.2E-04 | 2.9E-02 |
| Nus1       | Nuclear undecaprenyl pyrophosphate synthase 1 homolog (S. Cerevisiae) | 4.45 | 0.62  | 5.2E-04 | 2.9E-02 |
| Rpl37a     | Ribosomal protein l37a                                                | 8.47 | 0.58  | 5.3E-04 | 2.9E-02 |
| Pnrc1      | Proline-rich nuclear receptor coactivator 1                           | 4.92 | 0.87  | 5.5E-04 | 3.0E-02 |
| Camk4      | Calcium/calmodulin-dependent protein kinase IV                        | 4.15 | -0.61 | 5.6E-04 | 3.0E-02 |
| Tmem69     | Transmembrane protein 69                                              | 3.75 | 0.75  | 5.6E-04 | 3.0E-02 |
| Pols       | Polymerase (DNA directed) sigma                                       | 4.19 | 0.76  | 5.6E-04 | 3.0E-02 |
| Tspan5     | Tetraspanin 5                                                         | 5.26 | -0.70 | 5.6E-04 | 3.0E-02 |
| Cot11      | Coactosin-like 1 (Dictyostelium)                                      | 5.30 | -0.92 | 5.6E-04 | 3.0E-02 |
| Usmg5      | Up-regulated during skeletal muscle growth 5 homolog (mouse)          | 6.32 | 0.56  | 5.7E-04 | 3.0E-02 |
| Ntan1      | N-terminal asparagine amidase                                         | 4.37 | 0.68  | 5.8E-04 | 3.0E-02 |
| Yipf5      | Yip1 domain family, member 5                                          | 4.67 | 0.75  | 5.8E-04 | 3.0E-02 |
| Pik3r2     | Phosphoinositide-3-kinase, regulatory subunit 2 (beta)                | 4.81 | -0.99 | 5.8E-04 | 3.0E-02 |
| Il12a      | Interleukin 12a                                                       | 1.46 | 0.48  | 5.9E-04 | 3.0E-02 |
| Tfg        | Trk-fused gene                                                        | 3.89 | 0.60  | 5.9E-04 | 3.0E-02 |
| LOC290595  |                                                                       | 0.51 | -0.69 | 5.9E-04 | 3.0E-02 |
| Pcgf3      | Polycomb group ring finger 3                                          | 3.33 | -0.68 | 5.9E-04 | 3.0E-02 |
| Acad9      | Acyl-Coenzyme A dehydrogenase family, member 9                        | 4.86 | 0.64  | 5.9E-04 | 3.0E-02 |
| Lztf11     | Leucine zipper transcription factor-like 1                            | 4.66 | 0.72  | 5.9E-04 | 3.0E-02 |

|            |                                                                            |      |       |         |         |
|------------|----------------------------------------------------------------------------|------|-------|---------|---------|
| RGD1311605 | Similar to apoptosis related protein APR-3; p18 protein                    | 2.57 | 0.55  | 6.0E-04 | 3.0E-02 |
| Zfp469     | Zinc finger protein 469                                                    | 4.27 | -0.75 | 6.0E-04 | 3.0E-02 |
| Rplp2      | Ribosomal protein, large P2                                                | 6.22 | 0.57  | 6.1E-04 | 3.1E-02 |
| Kdm1       | Lysine (K)-specific demethylase 1                                          | 5.69 | 0.64  | 6.2E-04 | 3.1E-02 |
| Nudcd2     | Nudc domain containing 2                                                   | 3.10 | 0.65  | 6.2E-04 | 3.1E-02 |
| Golga7     | Golgi autoantigen, golgin subfamily a, 7                                   | 5.99 | 0.69  | 6.3E-04 | 3.1E-02 |
| Rnf208     | Ring finger protein 208                                                    | 2.80 | -0.70 | 6.3E-04 | 3.1E-02 |
| Otop3      | Otopetrin 3                                                                | 2.36 | -0.68 | 6.3E-04 | 3.1E-02 |
| Acsm5      | Acyl-coa synthetase medium-chain family member 5                           | 2.10 | -0.77 | 6.3E-04 | 3.1E-02 |
| Slc6a8     | Solute carrier family 6 (neurotransmitter transporter, creatine), member 8 | 5.73 | -0.59 | 6.3E-04 | 3.1E-02 |
| Psd        | Pleckstrin and Sec7 domain containing                                      | 5.74 | -1.13 | 6.4E-04 | 3.1E-02 |
| Ndufa2     | NADH dehydrogenase (ubiquinone) 1 alpha subcomplex, 2                      | 4.87 | 0.48  | 6.6E-04 | 3.2E-02 |
| Rpgr       | Retinitis pigmentosa gtpase regulator                                      | 3.30 | 0.71  | 6.6E-04 | 3.2E-02 |
| Sae1       | SUMO1 activating enzyme subunit 1                                          | 4.57 | 0.66  | 6.6E-04 | 3.2E-02 |
| Ubl3       | Ubiquitin-like 3                                                           | 5.90 | 1.29  | 6.6E-04 | 3.2E-02 |
| Spna2      | Alpha-spectrin 2                                                           | 7.99 | -0.69 | 6.6E-04 | 3.2E-02 |
| Wdr37      | WD repeat domain 37                                                        | 4.96 | 0.67  | 6.7E-04 | 3.2E-02 |
| RGD1560350 | Similar to proteasome subunit iota                                         | 0.92 | 1.11  | 6.8E-04 | 3.2E-02 |
| Gtf2b      | General transcription factor IIB                                           | 5.63 | 0.53  | 6.8E-04 | 3.2E-02 |
| Taok1      | TAO kinase 1                                                               | 6.84 | -0.51 | 6.8E-04 | 3.2E-02 |
| Arvcf      | Armadillo repeat gene deleted in velo-cardio-facial syndrome               | 3.96 | 1.04  | 6.8E-04 | 3.2E-02 |
| RT1-CE1    | RT1 class I, locus1                                                        | 1.08 | 0.89  | 6.9E-04 | 3.2E-02 |
| Cox7c      | Cytochrome c oxidase, subunit viic                                         | 6.05 | 0.63  | 6.9E-04 | 3.2E-02 |
| Ppa1       | Pyrophosphatase (inorganic) 1                                              | 5.00 | 0.53  | 6.9E-04 | 3.2E-02 |
| Iqsec3     | IQ motif and Sec7 domain 3                                                 | 5.82 | -0.54 | 6.9E-04 | 3.2E-02 |
| Ctxn1      | Cortexin 1                                                                 | 4.63 | -0.77 | 6.9E-04 | 3.2E-02 |
| RGD1559496 | Similar to hypothetical protein                                            | 4.88 | -0.71 | 6.9E-04 | 3.2E-02 |
| Agap2      | Arfgap with gtpase domain, ankyrin repeat and PH domain 2                  | 8.13 | -0.66 | 7.0E-04 | 3.2E-02 |
| Slbp       | Stem-loop binding protein                                                  | 1.88 | 0.75  | 7.0E-04 | 3.2E-02 |
| MGC94335   | Similar to hypothetical protein FLJ22555                                   | 4.43 | 0.96  | 7.0E-04 | 3.2E-02 |
| St3gal6    | ST3 beta-galactoside alpha-2,3-sialyltransferase 6                         | 3.46 | 0.88  | 7.0E-04 | 3.2E-02 |
| Sfxn5      | Sideroflexin 5                                                             | 4.56 | -0.60 | 7.1E-04 | 3.2E-02 |
| Map1a      | Microtubule-associated protein 1A                                          | 9.66 | -0.51 | 7.1E-04 | 3.2E-02 |

|              |                                                                            |      |       |         |         |
|--------------|----------------------------------------------------------------------------|------|-------|---------|---------|
| Cbfa2t3      | Core-binding factor, runt domain, alpha subunit 2; translocated to, 3      | 2.74 | -0.53 | 7.1E-04 | 3.2E-02 |
| Cilp         | Cartilage intermediate layer protein, nucleotide pyrophosphohydrolase      | 0.68 | 0.63  | 7.3E-04 | 3.2E-02 |
| Cnot7        | CCR4-NOT transcription complex, subunit 7                                  | 6.44 | 0.89  | 7.3E-04 | 3.2E-02 |
| Psmc6        | Proteasome (prosome, macropain) subunit, alpha type 6                      | 6.13 | 0.69  | 7.4E-04 | 3.2E-02 |
| Znf710       | Zinc finger protein 710                                                    | 2.06 | -0.69 | 7.5E-04 | 3.3E-02 |
| Ide          | Insulin degrading enzyme                                                   | 3.76 | 0.93  | 7.6E-04 | 3.3E-02 |
| Sh3pxd2a     | SH3 and PX domains 2A                                                      | 3.28 | -0.74 | 7.6E-04 | 3.3E-02 |
| LOC100233176 | Hypothetical protein LOC100233176                                          | 6.84 | 0.47  | 7.6E-04 | 3.3E-02 |
| 76           |                                                                            |      |       |         |         |
| Moap1        | Modulator of apoptosis 1                                                   | 6.84 | 0.47  | 7.6E-04 | 3.3E-02 |
| Rph3a        | Rabphilin 3A                                                               | 6.18 | -0.53 | 7.7E-04 | 3.3E-02 |
| Nfix         | Nuclear factor I/X (CCAAT-binding transcription factor)                    | 3.81 | -0.54 | 7.7E-04 | 3.3E-02 |
| Hba-a2       | Hemoglobin alpha, adult chain 2                                            | 4.89 | -0.88 | 7.8E-04 | 3.3E-02 |
| Cct8         | Chaperonin containing Tcp1, subunit 8 (theta)                              | 7.35 | 0.49  | 7.8E-04 | 3.3E-02 |
| Znf513       | Zinc finger protein 513                                                    | 3.98 | -0.68 | 7.8E-04 | 3.3E-02 |
| Arid1a       | AT rich interactive domain 1A (SWI-like)                                   | 4.87 | -0.46 | 7.9E-04 | 3.3E-02 |
| Nudt19       | Nudix (nucleoside diphosphate linked moiety X)-type motif 19               | 4.82 | 0.57  | 7.9E-04 | 3.3E-02 |
| Azi1         | 5-azacytidine induced 1                                                    | 3.69 | -0.51 | 7.9E-04 | 3.3E-02 |
| Yap1         | Yes-associated protein 1                                                   | 3.44 | -0.91 | 8.0E-04 | 3.3E-02 |
| Mmp17        | Matrix metalloproteinase 17                                                | 4.24 | -0.89 | 8.0E-04 | 3.3E-02 |
| Fabp4        | Fatty acid binding protein 4, adipocyte                                    | 0.97 | 0.75  | 8.1E-04 | 3.4E-02 |
| 3367353600   |                                                                            | 5.26 | 0.51  | 8.2E-04 | 3.4E-02 |
| Ncan         | Neurocan                                                                   | 5.69 | -0.54 | 8.3E-04 | 3.4E-02 |
| Bag1         | BCL2-associated athanogene                                                 | 4.66 | 0.56  | 8.3E-04 | 3.4E-02 |
| Gpr84        | G protein-coupled receptor 84                                              | 1.44 | -0.56 | 8.3E-04 | 3.4E-02 |
| C1ql3        | Complement component 1, q subcomponent-like 3                              | 6.76 | -0.67 | 8.4E-04 | 3.4E-02 |
| Mical1       | Microtubule associated monooxygenase, calponin and LIM domain containing 1 | 2.61 | -0.65 | 8.5E-04 | 3.4E-02 |
| Alg13        | Asparagine-linked glycosylation 13 homolog (S. Cerevisiae)                 | 2.97 | 0.78  | 8.5E-04 | 3.4E-02 |
| Gtf3c2       | General transcription factor IIIC, polypeptide 2, beta                     | 3.46 | -0.57 | 8.5E-04 | 3.4E-02 |
| Ufm1         | Ubiquitin-fold modifier 1                                                  | 3.21 | 0.81  | 8.6E-04 | 3.4E-02 |
| Lrsam1       | Leucine rich repeat and sterile alpha motif containing 1                   | 3.20 | -0.56 | 8.6E-04 | 3.4E-02 |
| Snph         | Syntaphilin                                                                | 6.86 | -0.58 | 8.6E-04 | 3.4E-02 |

|            |                                                                                                   |      |       |         |         |
|------------|---------------------------------------------------------------------------------------------------|------|-------|---------|---------|
| Ndufaf3    | NADH dehydrogenase (ubiquinone) 1 alpha subcomplex, assembly factor 3                             | 4.37 | 0.64  | 8.7E-04 | 3.4E-02 |
| Bat2       | HLA-B associated transcript 2                                                                     | 6.18 | -1.05 | 8.7E-04 | 3.4E-02 |
| Smarca2    | SWI/SNF related, matrix associated, actin dependent regulator of chromatin, subfamily a, member 2 | 6.68 | -0.73 | 8.8E-04 | 3.4E-02 |
| Il1rl2     |                                                                                                   | 0.63 | -0.78 | 8.8E-04 | 3.4E-02 |
| Laptm4a    | Lysosomal protein transmembrane 4 alpha                                                           | 7.65 | 0.61  | 8.8E-04 | 3.4E-02 |
| Tf         | Transferrin                                                                                       | 7.74 | -0.62 | 8.8E-04 | 3.4E-02 |
| Cep78      | Centrosomal protein 78kda                                                                         | 3.14 | 0.60  | 8.9E-04 | 3.4E-02 |
| Cyp26b1    | Cytochrome P450, family 26, subfamily b, polypeptide 1                                            | 2.48 | -0.64 | 8.9E-04 | 3.4E-02 |
| Hnrnpul1   | Heterogeneous nuclear ribonucleoprotein U-like 1                                                  | 5.12 | -0.62 | 8.9E-04 | 3.4E-02 |
| Ube2d3     | Ubiquitin-conjugating enzyme E2D 3 (UBC4/5 homolog, yeast)                                        | 6.11 | 0.57  | 8.9E-04 | 3.4E-02 |
| Kif21b     | Kinesin family member 21B                                                                         | 4.16 | -0.68 | 8.9E-04 | 3.4E-02 |
| Nfic       | Nuclear factor I/C                                                                                | 2.71 | -0.50 | 8.9E-04 | 3.4E-02 |
| Ifit2      | Interferon-induced protein with tetratricopeptide repeats 2                                       | 2.69 | 0.56  | 9.0E-04 | 3.4E-02 |
| Hspc159    | Galectin-related protein                                                                          | 4.93 | 0.60  | 9.1E-04 | 3.4E-02 |
| Ivd        | Isovaleryl coenzyme A dehydrogenase                                                               | 3.47 | -0.63 | 9.2E-04 | 3.5E-02 |
| Egr4       | Early growth response 4                                                                           | 2.15 | 0.61  | 9.3E-04 | 3.5E-02 |
| RGD1304587 | Similar to RIKEN cdna 2310033P09                                                                  | 4.93 | -0.49 | 9.3E-04 | 3.5E-02 |
| Dnajc18    | Dnaj (Hsp40) homolog, subfamily C, member 18                                                      | 5.12 | -0.51 | 9.3E-04 | 3.5E-02 |
| Kcnj4      | Potassium inwardly-rectifying channel, subfamily J, member 4                                      | 4.74 | -0.60 | 9.3E-04 | 3.5E-02 |
| Arl6ip1    | ADP-ribosylation factor-like 6 interacting protein 1                                              | 5.35 | 0.46  | 9.3E-04 | 3.5E-02 |
| Cox7b      | Cytochrome c oxidase subunit viib                                                                 | 4.17 | 0.64  | 9.4E-04 | 3.5E-02 |
| Gtpbp10    | GTP-binding protein 10 (putative)                                                                 | 3.66 | 0.49  | 9.4E-04 | 3.5E-02 |
| Camk2b     | Calcium/calmodulin-dependent protein kinase II beta                                               | 8.30 | -0.60 | 9.4E-04 | 3.5E-02 |
| Slc43a2    | Solute carrier family 43, member 2                                                                | 5.34 | -0.41 | 9.4E-04 | 3.5E-02 |
| RT1-CE7    | RT1 class I, locus CE7                                                                            | 2.27 | -1.35 | 9.4E-04 | 3.5E-02 |
| Mageh1     | Melanoma antigen, family H, 1                                                                     | 4.09 | 0.45  | 9.5E-04 | 3.5E-02 |
| Med11      | Mediator complex subunit 11                                                                       | 2.64 | 0.63  | 9.5E-04 | 3.5E-02 |
| Amotl1     | Angiomotin-like 1                                                                                 | 3.28 | -0.72 | 9.6E-04 | 3.5E-02 |
| Myh9       | Myosin, heavy chain 9, non-muscle                                                                 | 4.55 | -0.50 | 9.7E-04 | 3.5E-02 |
| Gabrg3     | Gamma-aminobutyric acid (GABA) A receptor, gamma 3                                                | 1.65 | 0.76  | 9.7E-04 | 3.5E-02 |

|            |                                                                            |      |       |         |         |
|------------|----------------------------------------------------------------------------|------|-------|---------|---------|
| Ccdc56     | Coiled-coil domain containing 56                                           | 3.57 | 0.65  | 9.8E-04 | 3.5E-02 |
| Pygb       | Phosphorylase, glycogen; brain                                             | 5.84 | 0.50  | 9.8E-04 | 3.5E-02 |
| Apc2       | Adenomatosis polyposis coli 2                                              | 3.97 | -0.50 | 9.9E-04 | 3.5E-02 |
| LOC683504  | Similar to zinc finger protein 639                                         | 2.73 | 0.64  | 1.0E-03 | 3.5E-02 |
| Cyb5r1     | Cytochrome b5 reductase 1                                                  | 3.31 | -0.70 | 1.0E-03 | 3.6E-02 |
| Lsm3       | LSM3 homolog, U6 small nuclear RNA associated ( <i>S. Cerevisiae</i> )     | 6.89 | 0.60  | 1.0E-03 | 3.7E-02 |
| Dscaml1    | Down syndrome cell adhesion molecule-like 1                                | 3.65 | 0.61  | 1.0E-03 | 3.7E-02 |
| Dek        | DEK oncogene                                                               | 6.84 | 0.58  | 1.1E-03 | 3.7E-02 |
| Pnmal1     | PNMA-like 1                                                                | 4.91 | -0.76 | 1.1E-03 | 3.7E-02 |
| Pnlip      | Pancreatic lipase                                                          | 2.86 | 0.60  | 1.1E-03 | 3.7E-02 |
| Dsn1       | DSN1, MIND kinetochore complex component, homolog ( <i>S. Cerevisiae</i> ) | 1.88 | 0.59  | 1.1E-03 | 3.7E-02 |
| Carm1      | Coactivator-associated arginine methyltransferase 1                        | 2.76 | -0.61 | 1.1E-03 | 3.7E-02 |
| Mettl9     | Methyltransferase like 9                                                   | 4.90 | 0.86  | 1.1E-03 | 3.8E-02 |
| Glt8d1     | Glycosyltransferase 8 domain containing 1                                  | 3.56 | 0.53  | 1.1E-03 | 3.8E-02 |
| Rab40b     | Rab40b, member RAS oncogene family                                         | 4.36 | 0.68  | 1.1E-03 | 3.8E-02 |
| Sf3a3      | Splicing factor 3a, subunit 3                                              | 6.29 | 0.57  | 1.1E-03 | 3.8E-02 |
| RGD1309077 | Similar to putative RNA methyltransferase                                  | 1.69 | 0.49  | 1.1E-03 | 3.8E-02 |
| Lyn        | V-src-1 Yamaguchi sarcoma viral related oncogene homolog                   | 3.47 | 0.86  | 1.1E-03 | 3.8E-02 |
| Nhlh2      | Nescient helix loop helix 2                                                | 1.48 | 0.82  | 1.1E-03 | 3.8E-02 |
| Dpt        | Dermatopontin                                                              | 1.57 | 0.80  | 1.1E-03 | 3.8E-02 |
| Abhd12     | Abhydrolase domain containing 12                                           | 5.13 | -1.11 | 1.1E-03 | 3.8E-02 |
| Myst3      | MYST histone acetyltransferase (monocytic leukemia) 3                      | 5.14 | -0.56 | 1.1E-03 | 3.8E-02 |
| Vcp        | Valosin-containing protein                                                 | 6.54 | 0.52  | 1.1E-03 | 3.8E-02 |
| Nfia       | Nuclear factor I/A                                                         | 3.82 | -0.59 | 1.1E-03 | 3.8E-02 |
| C1galt1c1  | C1GALT1-specific chaperone 1                                               | 5.23 | 0.60  | 1.2E-03 | 3.9E-02 |
| Eif3s6ip   | Eukaryotic translation initiation factor 3, subunit 6 interacting protein  | 5.75 | 0.51  | 1.2E-03 | 3.9E-02 |
| Kcnc3      | Potassium voltage gated channel, Shaw-related subfamily, member 3          | 4.83 | -1.12 | 1.2E-03 | 3.9E-02 |
| 3366144000 |                                                                            | 1.57 | 0.57  | 1.2E-03 | 3.9E-02 |
| Tm7sf3     | Transmembrane 7 superfamily member 3                                       | 3.85 | 0.57  | 1.2E-03 | 3.9E-02 |
| Ndufs1     | NADH dehydrogenase (ubiquinone) Fe-S protein 1                             | 7.09 | 0.57  | 1.2E-03 | 3.9E-02 |
| Pcdhb9     | Protocadherin beta 9                                                       | 3.76 | 0.56  | 1.2E-03 | 3.9E-02 |
| Pcna       | Proliferating cell nuclear antigen                                         | 5.22 | 0.69  | 1.2E-03 | 3.9E-02 |

|            |                                                                                 |      |       |         |         |
|------------|---------------------------------------------------------------------------------|------|-------|---------|---------|
| Ephx2      | Epoxide hydrolase 2, cytoplasmic                                                | 3.01 | 0.62  | 1.2E-03 | 3.9E-02 |
| Mrps15     | Mitochondrial ribosomal protein S15                                             | 5.30 | 0.66  | 1.2E-03 | 3.9E-02 |
| Pde10a     |                                                                                 | 4.09 | -0.50 | 1.2E-03 | 3.9E-02 |
| Aard       | Alanine and arginine rich domain containing protein                             | 3.01 | 0.81  | 1.2E-03 | 3.9E-02 |
| Nipsnap3b  | Nipsnap homolog 3B (C. Elegans)                                                 | 3.30 | 0.72  | 1.2E-03 | 3.9E-02 |
| Numb1      | Numb homolog (Drosophila)-like                                                  | 3.33 | -0.84 | 1.2E-03 | 3.9E-02 |
| Nos3       | Nitric oxide synthase 3, endothelial cell                                       | 2.75 | -0.99 | 1.2E-03 | 4.0E-02 |
| Ppp3ca     | Protein phosphatase 3 (formerly 2B), catalytic subunit, alpha isoform           | 8.44 | -0.47 | 1.3E-03 | 4.0E-02 |
| Mlh1       | Mutl homolog 1 (E. Coli)                                                        | 2.36 | 0.54  | 1.3E-03 | 4.0E-02 |
| A2ld1      | AlG2-like domain 1                                                              | 4.53 | 0.86  | 1.3E-03 | 4.0E-02 |
| Ccl27      | Chemokine (C-C motif) ligand 27                                                 | 3.50 | -0.88 | 1.3E-03 | 4.0E-02 |
| Xrcc5      |                                                                                 | 5.06 | 0.69  | 1.3E-03 | 4.0E-02 |
| Sirt3      | Sirtuin (silent mating type information regulation 2 homolog) 3 (S. Cerevisiae) | 3.88 | -0.70 | 1.3E-03 | 4.0E-02 |
| Tmem214    | Transmembrane protein 214                                                       | 2.74 | -0.62 | 1.3E-03 | 4.0E-02 |
| Tpo1       | Developmentally regulated protein TPO1                                          | 5.87 | -0.46 | 1.3E-03 | 4.1E-02 |
| Kcnh3      | Potassium voltage-gated channel, subfamily H (eag-related), member 3            | 3.72 | -0.69 | 1.3E-03 | 4.1E-02 |
| Slc1a2     | Solute carrier family 1 (glial high affinity glutamate transporter), member 2   | 9.04 | -0.60 | 1.3E-03 | 4.1E-02 |
| Cdh18      | Cadherin 18, type 2                                                             | 2.86 | 0.97  | 1.3E-03 | 4.1E-02 |
| Sirpa      | Signal-regulatory protein alpha                                                 | 5.69 | -0.61 | 1.3E-03 | 4.1E-02 |
| Shank1     | SH3 and multiple ankyrin repeat domains 1                                       | 5.44 | -0.74 | 1.3E-03 | 4.1E-02 |
| Polr3d     | Polymerase (RNA) III (DNA directed) polypeptide D                               | 5.63 | 0.75  | 1.3E-03 | 4.1E-02 |
| Ostc       | Oligosaccharyltransferase complex subunit                                       | 5.41 | 0.49  | 1.3E-03 | 4.1E-02 |
| Robo1      | Roundabout homolog 1 (Drosophila)                                               | 4.90 | -0.49 | 1.3E-03 | 4.1E-02 |
| Man1a1     | Mannosidase, alpha, class 1A, member 1                                          | 4.31 | -0.96 | 1.3E-03 | 4.1E-02 |
| RGD1307947 | Similar to RIKEN cdna C430008C19                                                | 5.27 | 0.52  | 1.4E-03 | 4.1E-02 |
| Ttc19      | Tetratricopeptide repeat domain 19                                              | 6.35 | 0.52  | 1.4E-03 | 4.2E-02 |
| Kcnj9      | Potassium inwardly-rectifying channel, subfamily J, member 9                    | 4.78 | -0.83 | 1.4E-03 | 4.2E-02 |
| LOC689852  | Similar to Proteasome inhibitor PI31 subunit                                    | 3.63 | 0.62  | 1.4E-03 | 4.2E-02 |
| Rsl1d1     | Ribosomal L1 domain containing 1                                                | 5.31 | 0.59  | 1.4E-03 | 4.2E-02 |
| Zfyve19    | Zinc finger, FYVE domain containing 19                                          | 2.97 | -0.64 | 1.4E-03 | 4.2E-02 |
| Cacng8     | Calcium channel, voltage-dependent, gamma subunit 8                             | 4.68 | -0.92 | 1.4E-03 | 4.2E-02 |
| Atf5       | Activating transcription factor 5                                               | 3.97 | -0.74 | 1.4E-03 | 4.2E-02 |
| Lpl        | Lipoprotein lipase                                                              | 5.93 | 0.54  | 1.4E-03 | 4.2E-02 |



|            |                                                                                   |      |       |         |         |
|------------|-----------------------------------------------------------------------------------|------|-------|---------|---------|
| Cyp2j4     | Cytochrome P450, family 2, subfamily j, polypeptide 4                             | 1.88 | 0.53  | 1.4E-03 | 4.3E-02 |
| Tle3       | Transducin-like enhancer of split 3 (E(sp1) homolog, Drosophila)                  | 3.50 | -0.61 | 1.4E-03 | 4.3E-02 |
| Mrpl55     | Mitochondrial ribosomal protein L55                                               | 4.88 | 0.50  | 1.4E-03 | 4.3E-02 |
| Dlgap4     | Discs, large homolog-associated protein 4 (Drosophila)                            | 3.77 | -0.62 | 1.4E-03 | 4.3E-02 |
| Sdk2       | Sidekick homolog 2 (chicken)                                                      | 2.50 | -0.49 | 1.5E-03 | 4.3E-02 |
| Kctd3      | Potassium channel tetramerisation domain containing 3                             | 4.70 | -0.57 | 1.5E-03 | 4.3E-02 |
| Kcng1      | Potassium voltage-gated channel, subfamily G, member 1                            | 3.74 | -0.90 | 1.5E-03 | 4.3E-02 |
| Ilf3       | Interleukin enhancer binding factor 3                                             | 4.92 | -0.63 | 1.5E-03 | 4.3E-02 |
| Nphp1      | Nephronophthisis 1 (juvenile) homolog (human)                                     | 4.32 | -0.53 | 1.5E-03 | 4.3E-02 |
| Arhgef11   | Rho guanine nucleotide exchange factor (GEF) 11                                   | 3.90 | -0.71 | 1.5E-03 | 4.3E-02 |
| Tmem14a    | Transmembrane protein 14A                                                         | 5.32 | -0.65 | 1.5E-03 | 4.3E-02 |
| RGD1560070 |                                                                                   | 6.54 | -0.70 | 1.5E-03 | 4.4E-02 |
| Nsmce4a    | Non-SMC element 4 homolog A (S. Cerevisiae)                                       | 5.02 | 0.65  | 1.5E-03 | 4.4E-02 |
| Ralb       | V-ral simian leukemia viral oncogene homolog B (ras related; GTP binding protein) | 5.04 | -0.68 | 1.5E-03 | 4.4E-02 |
| Lysmd3     | Lysm, putative peptidoglycan-binding, domain containing 3                         | 2.54 | 0.93  | 1.5E-03 | 4.4E-02 |
| Fhl1       | Four and a half LIM domains 1                                                     | 5.25 | 0.56  | 1.5E-03 | 4.4E-02 |
| Clu        |                                                                                   | 8.99 | -0.63 | 1.5E-03 | 4.4E-02 |
| Ankh       | Ankylosis, progressive homolog (mouse)                                            | 4.43 | -0.69 | 1.6E-03 | 4.5E-02 |
| Rbm18      | RNA binding motif protein 18                                                      | 5.67 | 0.91  | 1.6E-03 | 4.5E-02 |
| B3galnt1   | Beta-1,3-N-acetylgalactosaminyltransferase 1                                      | 3.23 | 0.66  | 1.6E-03 | 4.5E-02 |
| Gria4      | Glutamate receptor, ionotropic, AMPA4                                             | 6.11 | 0.61  | 1.6E-03 | 4.5E-02 |
| Ppcs       | Phosphopantothenoylecysteine synthetase                                           | 2.71 | 0.46  | 1.6E-03 | 4.6E-02 |
| Cnpy2      | Canopy 2 homolog (zebrafish)                                                      | 5.51 | 0.45  | 1.6E-03 | 4.6E-02 |
| Brd2       | Bromodomain containing 2                                                          | 5.23 | -0.45 | 1.6E-03 | 4.6E-02 |
| Pik3r4     | Phosphoinositide-3-kinase, regulatory subunit 4                                   | 4.45 | 0.62  | 1.7E-03 | 4.6E-02 |
| Bid        | BH3 interacting domain death agonist                                              | 2.53 | -0.68 | 1.7E-03 | 4.6E-02 |
| Gtf2e2     | General transcription factor IIE, polypeptide 2, beta                             | 4.04 | 0.64  | 1.7E-03 | 4.6E-02 |
| Supt4h1    | Suppressor of Ty 4 homolog 1 (S. Cerevisiae)                                      | 4.58 | 0.50  | 1.7E-03 | 4.6E-02 |
| Snapap     | SNAP-associated protein                                                           | 5.32 | 0.67  | 1.7E-03 | 4.6E-02 |
| Stard3nl   | STARD3 N-terminal like                                                            | 4.02 | 0.47  | 1.7E-03 | 4.6E-02 |
| Gspt2      | G1 to S phase transition 2                                                        | 5.90 | 0.51  | 1.7E-03 | 4.6E-02 |

|            |                                                             |      |       |         |         |
|------------|-------------------------------------------------------------|------|-------|---------|---------|
| Gsk3b      | Glycogen synthase kinase 3 beta                             | 4.47 | -0.53 | 1.7E-03 | 4.6E-02 |
| Pkia       | Protein kinase (camp-dependent, catalytic) inhibitor alpha  | 5.88 | 0.54  | 1.7E-03 | 4.6E-02 |
| Mprip      | Myosin phosphatase Rho interacting protein                  | 5.65 | -0.46 | 1.7E-03 | 4.6E-02 |
| RGD1306508 |                                                             | 6.73 | 0.75  | 1.7E-03 | 4.6E-02 |
| Zfp709l1   | Zinc finger protein 709-like 1                              | 1.89 | 0.70  | 1.7E-03 | 4.6E-02 |
| Cox18      | COX18 cytochrome c oxidase assembly homolog (S. Cerevisiae) | 2.55 | 0.86  | 1.7E-03 | 4.6E-02 |
| Anks1a     | Ankyrin repeat and sterile alpha motif domain containing 1A | 2.59 | 0.51  | 1.7E-03 | 4.7E-02 |
| Reln       |                                                             | 3.38 | 0.76  | 1.7E-03 | 4.7E-02 |
| Rasd2      | RASD family, member 2                                       | 3.56 | -0.55 | 1.7E-03 | 4.7E-02 |
| RGD1308215 |                                                             | 4.58 | -0.74 | 1.7E-03 | 4.7E-02 |
| Accn2      | Amiloride-sensitive cation channel 2, neuronal              | 3.79 | -0.65 | 1.7E-03 | 4.7E-02 |
| Rere       | Arginine-glutamic acid dipeptide (RE) repeats               | 4.62 | -0.48 | 1.7E-03 | 4.7E-02 |
| Cstb       | Cystatin B (stefin B)                                       | 3.09 | 0.63  | 1.7E-03 | 4.7E-02 |
| Gucy1b3    |                                                             | 6.23 | 0.56  | 1.7E-03 | 4.7E-02 |
| Sp100      | SP100 nuclear antigen                                       | 1.64 | 0.63  | 1.7E-03 | 4.7E-02 |
| Fam101b    | Family with sequence similarity 101, member B               | 2.41 | -0.61 | 1.8E-03 | 4.7E-02 |
| Mael       | Maelstrom homolog (Drosophila)                              | 0.44 | 0.62  | 1.8E-03 | 4.7E-02 |
| Map1b      | Microtubule-associated protein 1B                           | 8.87 | -0.58 | 1.8E-03 | 4.7E-02 |
| Pigt       | Phosphatidylinositol glycan anchor biosynthesis, class T    | 3.75 | -0.74 | 1.8E-03 | 4.7E-02 |
| Usp14      | Ubiquitin specific peptidase 14                             | 6.50 | 0.67  | 1.8E-03 | 4.7E-02 |
| Adam11     | ADAM metallopeptidase domain 11                             | 4.96 | -0.88 | 1.8E-03 | 4.8E-02 |
| RGD1565096 | Similar to TSG118.1                                         | 4.27 | -0.49 | 1.8E-03 | 4.8E-02 |
| Sacm1l     |                                                             | 5.59 | 0.42  | 1.8E-03 | 4.8E-02 |
| Fam164a    | Family with sequence similarity 164, member A               | 3.57 | 0.52  | 1.8E-03 | 4.8E-02 |
| Fam168a    | Family with sequence similarity 168, member A               | 6.13 | -0.60 | 1.8E-03 | 4.8E-02 |
| Nudt3      | Nudix (nucleoside diphosphate linked moiety X)-type motif 3 | 7.76 | -0.76 | 1.8E-03 | 4.8E-02 |
| LOC293103  | Similar to RIKEN cdna 0610007P06                            | 3.76 | 0.84  | 1.8E-03 | 4.8E-02 |
| Necab1     | N-terminal EF-hand calcium binding protein 1                | 5.36 | 0.64  | 1.8E-03 | 4.8E-02 |
| Kalrn      | Kalirin, rhogef kinase                                      | 5.66 | -0.78 | 1.9E-03 | 4.8E-02 |
| Bbs5       | Bardet-Biedl syndrome 5                                     | 3.77 | 0.64  | 1.9E-03 | 4.8E-02 |
| Mettl6     | Methyltransferase like 6                                    | 3.82 | 0.48  | 1.9E-03 | 4.8E-02 |

|           |                                                                                                      |      |       |         |         |
|-----------|------------------------------------------------------------------------------------------------------|------|-------|---------|---------|
| Necap2    | NECAP endocytosis associated 2                                                                       | 2.75 | -0.64 | 1.9E-03 | 4.8E-02 |
| Acvr1     | Activin A receptor, type I                                                                           | 3.13 | -0.56 | 1.9E-03 | 4.8E-02 |
| Nell1     | NEL-like 1 (chicken)                                                                                 | 4.27 | 0.46  | 1.9E-03 | 4.8E-02 |
| LOC690102 |                                                                                                      | 0.82 | 0.74  | 1.9E-03 | 4.8E-02 |
| Vars      | Valyl-trna synthetase                                                                                | 3.73 | -0.73 | 1.9E-03 | 4.8E-02 |
| Paics     | Phosphoribosylaminoimidazole carboxylase, phosphoribosylaminoimidazole succinocarboxamide synthetase | 3.48 | 0.53  | 1.9E-03 | 4.8E-02 |
| Cmip      | C-Maf-inducing protein                                                                               | 4.07 | -0.57 | 1.9E-03 | 4.8E-02 |
| Rab6b     | RAB6B, member RAS oncogene family                                                                    | 6.95 | -0.57 | 1.9E-03 | 4.8E-02 |
| Eno2      | Enolase 2, gamma, neuronal                                                                           | 7.49 | -1.03 | 1.9E-03 | 4.8E-02 |
| Fam134b   | Family with sequence similarity 134, member B                                                        | 6.45 | 0.70  | 1.9E-03 | 4.8E-02 |
| Rab15     | RAB15, member RAS oncogene family                                                                    | 6.25 | -0.87 | 1.9E-03 | 4.8E-02 |
| Fam89a    | Family with sequence similarity 89, member A                                                         | 2.02 | -0.61 | 1.9E-03 | 4.8E-02 |
| Wdr47     | WD repeat domain 47                                                                                  | 6.69 | 0.63  | 1.9E-03 | 4.8E-02 |
| Plxnb3    | Plexin B3                                                                                            | 2.68 | -0.51 | 1.9E-03 | 4.8E-02 |
| Idi1      | Isopentenyl-diphosphate delta isomerase 1                                                            | 5.25 | 0.73  | 1.9E-03 | 4.8E-02 |
| Acsl6     | Acyl-coa synthetase long-chain family member 6                                                       | 6.96 | -0.69 | 1.9E-03 | 4.8E-02 |
| Cited2    | Cbp/p300-interacting transactivator, with Glu/Asp-rich carboxy-terminal domain, 2                    | 3.98 | 0.62  | 1.9E-03 | 4.8E-02 |
| Npc2      | Niemann-Pick disease, type C2                                                                        | 5.24 | -0.77 | 2.0E-03 | 4.8E-02 |
| Klhl26    | Kelch-like 26 (Drosophila)                                                                           | 4.48 | -0.57 | 2.0E-03 | 4.8E-02 |
| Il22ra2   | Interleukin 22 receptor, alpha 2                                                                     | 1.04 | 0.79  | 2.0E-03 | 4.9E-02 |
| Ccdc126   | Coiled-coil domain containing 126                                                                    | 4.29 | 0.51  | 2.0E-03 | 4.9E-02 |
| Pnpt1     | Polyribonucleotide nucleotidyltransferase 1                                                          | 3.30 | 0.59  | 2.0E-03 | 4.9E-02 |
| Slc8a2    | Solute carrier family 8 (sodium/calcium exchanger), member 2                                         | 5.41 | -0.64 | 2.0E-03 | 4.9E-02 |
| Nup62     | Nucleoporin 62                                                                                       | 3.21 | -0.57 | 2.0E-03 | 4.9E-02 |
| Gng7      | Guanine nucleotide binding protein (G protein), gamma 7                                              | 4.81 | -0.57 | 2.0E-03 | 4.9E-02 |
| Btg1      | B-cell translocation gene 1, anti-proliferative                                                      | 4.36 | -0.52 | 2.0E-03 | 4.9E-02 |
| LOC362419 | Similar to CG33331-PA                                                                                | 3.70 | 0.55  | 2.0E-03 | 4.9E-02 |
| Tmem49    | Transmembrane protein 49                                                                             | 5.50 | 0.47  | 2.0E-03 | 4.9E-02 |
| Rab4b     | RAB4B, member RAS oncogene family                                                                    | 4.47 | -1.02 | 2.0E-03 | 4.9E-02 |
| Filip1    | Filamin A interacting protein 1                                                                      | 4.70 | -0.51 | 2.0E-03 | 4.9E-02 |
| Efnb1     | Ephrin B1                                                                                            | 2.20 | -0.56 | 2.0E-03 | 4.9E-02 |
| Ttrap     | Traf and Tnf receptor associated protein                                                             | 4.24 | 0.71  | 2.0E-03 | 4.9E-02 |
| Slc12a5   | Solute carrier family 12 (potassium-chloride transporter), member 5                                  | 5.68 | -0.43 | 2.0E-03 | 4.9E-02 |
| Pogk      | Pogo transposable element with KRAB domain                                                           | 4.18 | -0.44 | 2.1E-03 | 4.9E-02 |

|         |                                                                           |      |       |         |         |
|---------|---------------------------------------------------------------------------|------|-------|---------|---------|
| Prdm2   |                                                                           | 4.48 | -0.43 | 2.1E-03 | 4.9E-02 |
| Tspan12 | Tetraspanin 12                                                            | 4.56 | 0.80  | 2.1E-03 | 4.9E-02 |
| Slc16a1 | Solute carrier family 16, member 1<br>(monocarboxylic acid transporter 1) | 5.45 | -0.80 | 2.1E-03 | 4.9E-02 |
| Ube2d2  | Ubiquitin-conjugating enzyme E2D 2                                        | 6.06 | 0.59  | 2.1E-03 | 4.9E-02 |
| Shc2    |                                                                           | 4.82 | 0.74  | 2.1E-03 | 4.9E-02 |
| Zc3h7a  | Zinc finger CCCH type containing 7 A                                      | 4.94 | 0.53  | 2.1E-03 | 4.9E-02 |
| Ptdss2  | Phosphatidylserine synthase 2                                             | 4.50 | -0.73 | 2.1E-03 | 4.9E-02 |

---

Table S4. Enrichment of segregating (P vs NP rat) coding sequence (CDS) and UTR SNPs in genes differentially expressed in the hippocampus of P and NP rats

|             | Number of Segregating SNPs |                                   |          |                     |         | Number of Genes     |                                |          |                     |         |
|-------------|----------------------------|-----------------------------------|----------|---------------------|---------|---------------------|--------------------------------|----------|---------------------|---------|
|             | In all Expressed Genes     | In Differentially Expressed Genes | Fraction | $\chi^2*$ (Pearson) | P value | All Expressed Genes | Differentially Expressed Genes | Fraction | $\chi^2*$ (Pearson) | P value |
| CDS and UTR | 2158                       | 130                               | 0.060    | 12.924              | 0.0003  | 881                 | 58                             | 0.066    | 9.129               | 0.003   |
| CDS         | 1698                       | 97                                | 0.057    | 6.734               | 0.01    | 739                 | 50                             | 0.068    | 8.886               | 0.003   |
| Synonymous  | 1177                       | 66                                | 0.056    | 3.708               | 0.054   | 612                 | 43                             | 0.070    | 8.972               | 0.003   |
| Mis-sense   | 517                        | 30                                | 0.058    | 2.082               | 0.149   | 311                 | 16                             | 0.051    | 0.322               | 0.57    |
| Non-sense   | 2                          | 1                                 |          |                     |         | 2                   | 1                              |          |                     |         |
| UTR         | 460                        | 33                                | 0.072    | 7.423               | 0.006   | 327                 | 23                             | 0.070    | 4.69                | 0.03    |
| Gene        | 11364                      | 485                               | 0.043    |                     |         | 11364               | 485                            | 0.043    |                     |         |

\*df = 1

Table S5. Functional domains (GO Term) with over-representation of differentially expressed genes (FDR < 0.05) in the hippocampus of P and NP rats

| GO Term                       | Count | Fold Enrichment | <i>P</i> Value | Adj. <i>P</i> (Benjamini) |
|-------------------------------|-------|-----------------|----------------|---------------------------|
| GO:0005516~calmodulin binding | 12    | 4.86            | 3.39E-05       | 5.03E-03                  |
| GO:0045202~synapse            | 25    | 2.37            | 1.42E-04       | 9.34E-03                  |
| GO:0030054~cell junction      | 28    | 2.30            | 8.45E-05       | 1.11E-02                  |
| GO:0030425~dendrite           | 18    | 2.76            | 2.79E-04       | 1.37E-02                  |
| GO:0043005~neuron projection  | 25    | 2.06            | 1.08E-03       | 4.65E-02                  |

Table S6. Genes differentially expressed in the hippocampus of P and NP rats and classified in the function domains of calmodulin binding, synapse, and neuronal projection

| Gene Symbol | Gene Name                                                    | Ave Exp | log2 FC | P Value | FDR     | Function* Domain |
|-------------|--------------------------------------------------------------|---------|---------|---------|---------|------------------|
| Abcb1b      | ATP-binding cassette, sub-family B (MDR/TAP), member 1B      | 3.05    | -1.44   | 2.6E-06 | 2.2E-03 | 2                |
| Add2        | Adducin 2 (beta)                                             | 5.27    | 0.90    | 6.3E-05 | 1.3E-02 | 1                |
| Adrbk1      | Adrenergic, beta, receptor kinase 1                          | 5.68    | 0.92    | 3.2E-04 | 2.2E-02 | 2,3              |
| Amotl1      | Angiomotin-like 1                                            | 3.28    | 0.72    | 9.6E-04 | 3.5E-02 | 2                |
| Asam        | Adipocyte-specific adhesion molecule                         | 4.46    | 0.78    | 4.9E-05 | 1.3E-02 | 2                |
| Atp2b2      | Atpase, Ca++ transporting, plasma membrane 2                 | 6.23    | 1.04    | 1.1E-04 | 1.5E-02 | 1,3              |
| Bace1       | Beta-site APP cleaving enzyme 1                              | 5.03    | -0.85   | 4.3E-06 | 3.1E-03 | 3                |
| Bsn         | Bassoon                                                      | 5.86    | 0.89    | 2.5E-04 | 1.9E-02 | 2                |
| Camk2b      | Calcium/calmodulin-dependent protein kinase II beta          | 8.30    | 0.60    | 9.4E-04 | 3.5E-02 | 1                |
| Camk4       | Calcium/calmodulin-dependent protein kinase IV               | 4.15    | 0.61    | 5.6E-04 | 3.0E-02 | 1                |
| Camkv       | Cam kinase-like vesicle-associated                           | 7.68    | -0.63   | 2.8E-05 | 9.7E-03 | 1                |
| Chrm4       | Cholinergic receptor, muscarinic 4                           | 2.19    | 0.77    | 5.1E-04 | 2.9E-02 | 2,3              |
| Ddn         | Dendrin                                                      | 9.27    | 0.83    | 9.8E-05 | 1.5E-02 | 3                |
| Dlg4        | Discs, large homolog 4 (Drosophila)                          | 5.66    | 0.81    | 8.6E-05 | 1.5E-02 | 2                |
| Dlgap4      | Discs, large homolog-associated protein 4 (Drosophila)       | 3.77    | 0.62    | 1.4E-03 | 4.3E-02 | 2                |
| Dpysl5      | Dihydropyrimidinase-like 5                                   | 2.60    | 0.81    | 2.5E-04 | 1.9E-02 | 3                |
| Efnb1       | Ephrin B1                                                    | 2.20    | 0.56    | 2.0E-03 | 4.9E-02 | 2                |
| Freq        | Frequenin homolog (Drosophila)                               | 6.67    | 0.89    | 1.1E-04 | 1.5E-02 | 2,3              |
| Gabbr1      | Gamma-aminobutyric acid (GABA) B receptor 1                  | 8.02    | 0.91    | 2.6E-04 | 2.0E-02 | 2                |
| Gabrg3      | Gamma-aminobutyric acid (GABA) A receptor, gamma 3           | 1.65    | -0.76   | 9.7E-04 | 3.5E-02 | 2                |
| Gja1        | Gap junction protein, alpha 1                                | 7.71    | 0.49    | 4.2E-04 | 2.6E-02 | 2                |
| Gjd2        | Gap junction protein, delta 2                                | 3.03    | -0.87   | 8.0E-05 | 1.4E-02 | 2                |
| Gria4       | Glutamate receptor, ionotropic, AMPA4                        | 6.11    | -0.61   | 1.6E-03 | 4.5E-02 | 2,3              |
| Grin2b      | Glutamate receptor, ionotropic, N-methyl D-aspartate 2B      | 4.76    | 0.74    | 1.1E-04 | 1.5E-02 | 2,3              |
| Grm2        | Glutamate receptor, metabotropic 2                           | 1.87    | 0.73    | 1.1E-04 | 1.5E-02 | 2,3              |
| Gsk3b       | Glycogen synthase kinase 3 beta                              | 4.47    | 0.53    | 1.7E-03 | 4.6E-02 | 3                |
| Itpkc       | Inositol 1,4,5-trisphosphate 3-kinase C                      | 2.40    | 0.57    | 7.4E-05 | 1.4E-02 | 1                |
| Kalrn       | Kalirin, rhogef kinase                                       | 5.66    | 0.78    | 1.9E-03 | 4.8E-02 | 3                |
| Kcnj4       | Potassium inwardly-rectifying channel, subfamily J, member 4 | 4.74    | 0.60    | 9.3E-04 | 3.5E-02 | 3                |
| Lyn         | V-yes-1 Yamaguchi sarcoma viral                              | 3.47    | -0.86   | 1.1E-03 | 3.8E-02 | 2                |

|          | related oncogene homolog                                                      |      |       |         |         |     |
|----------|-------------------------------------------------------------------------------|------|-------|---------|---------|-----|
| Map1b    | Microtubule-associated protein 1B                                             | 8.87 | 0.58  | 1.8E-03 | 4.7E-02 | 2,3 |
| Map2k4   | Mitogen activated protein kinase kinase 4                                     | 5.62 | -0.50 | 3.4E-04 | 2.3E-02 | 3   |
| Myh7     | Myosin, heavy chain 7, cardiac muscle, beta                                   | 2.02 | 0.99  | 6.9E-05 | 1.3E-02 | 1,2 |
| Myh9     | Myosin, heavy chain 9, non-muscle                                             | 4.55 | 0.50  | 9.7E-04 | 3.5E-02 | 1,2 |
| Nos3     | Nitric oxide synthase 3, endothelial cell                                     | 2.75 | 0.99  | 1.2E-03 | 4.0E-02 | 1   |
| Ophn1    | Oligophrenin 1                                                                | 3.69 | -0.69 | 1.3E-04 | 1.5E-02 | 2,3 |
| Oprm1    | Opioid receptor, mu 1                                                         | 1.91 | -0.76 | 3.7E-04 | 2.4E-02 | 2   |
| Pcdhga12 | Protocadherin gamma subfamily A, 12                                           | 5.74 | 1.10  | 2.3E-04 | 1.9E-02 | 2   |
| Pcdhgc3  | Protocadherin gamma subfamily C, 3                                            | 5.74 | 1.10  | 2.3E-04 | 1.9E-02 | 2   |
| Pex5l    | Peroxisomal biogenesis factor 5-like                                          | 5.24 | 0.70  | 7.4E-05 | 1.4E-02 | 3   |
| Ppp1r9b  | Protein phosphatase 1, regulatory subunit 9B                                  | 8.02 | 0.62  | 1.2E-04 | 1.5E-02 | 2,3 |
| Ppp3ca   | Protein phosphatase 3 (formerly 2B), catalytic subunit, alpha isoform         | 8.44 | 0.47  | 1.3E-03 | 4.0E-02 | 1   |
| Pygb     | Phosphorylase, glycogen; brain                                                | 5.84 | -0.50 | 9.8E-04 | 3.5E-02 | 3   |
| Robo1    | Roundabout homolog 1 (Drosophila)                                             | 4.90 | 0.49  | 1.3E-03 | 4.1E-02 | 3   |
| Rph3a    | Rabphilin 3A                                                                  | 6.18 | 0.53  | 7.7E-04 | 3.3E-02 | 2   |
| Sae1     | SUMO1 activating enzyme subunit 1                                             | 4.57 | -0.66 | 6.6E-04 | 3.2E-02 | 1   |
| Shank1   | SH3 and multiple ankyrin repeat domains 1                                     | 5.44 | 0.74  | 1.3E-03 | 4.1E-02 | 2,3 |
| Slc12a5  | Solute carrier family 12 (potassium-chloride transporter), member 5           | 5.68 | 0.43  | 2.0E-03 | 4.9E-02 | 3   |
| Slc1a2   | Solute carrier family 1 (glial high affinity glutamate transporter), member 2 | 9.04 | 0.60  | 1.3E-03 | 4.1E-02 | 2,3 |
| Slc30a3  | Solute carrier family 30 (zinc transporter), member 3                         | 4.27 | 1.19  | 4.6E-04 | 2.8E-02 | 2   |
| Slc8a2   | Solute carrier family 8 (sodium/calcium exchanger), member 2                  | 5.41 | 0.64  | 2.0E-03 | 4.9E-02 | 1   |
| Snapap   | SNAP-associated protein                                                       | 5.32 | -0.67 | 1.7E-03 | 4.6E-02 | 2   |
| Snph     | Syntaphilin                                                                   | 6.86 | 0.58  | 8.6E-04 | 3.4E-02 | 2   |
| Sort1    | Sortilin 1                                                                    | 7.77 | 0.96  | 2.4E-04 | 1.9E-02 | 3   |
| Spna2    | Alpha-spectrin 2                                                              | 7.99 | 0.69  | 6.6E-04 | 3.2E-02 | 1,2 |
| Syn1     | Synapsin I                                                                    | 6.09 | 0.79  | 5.7E-05 | 1.3E-02 | 2   |
| Synpo    | Synaptopodin                                                                  | 3.29 | 0.81  | 5.6E-05 | 1.3E-02 | 2,3 |

\* 1. Calmodulin binding; 2. Synapse; 3. Neuronal Projection



## **Supplementary Materials and Methods**

### ***Exome and cDNA sequencing library construction***

Exome sequencing libraries were constructed using Agilent SureSelect protocols. Briefly, P and NP rat genomic DNA was fragmented to the 150 – 300 base-pair range by sonication. The genomic fragments were ligated with universal adaptors and amplified by PCR for 6 cycles. Exonic regions were captured by hybridization with the Mouse All Exon bait library at 60C for 24 hours. The captured exome genomic libraries were amplified again by PCR for 13 cycles before sequencing. For cDNA library construction, total RNA was extracted from hippocampal tissue and treated with DNase I (Qiagen) to eliminate residual genomic DNA contamination. Fifty ng of mRNA isolated with Dynabeads oligo (dT)<sub>25</sub> magnetic beads (Invitrogen) was fragmented to the 150 – 500 base pair range in fragmentation buffer (Ambion) at 70 C for 3 min. Fragmented mRNA was treated with Antarctic phosphatase (New England Biolab) and then phosphorylated with polynucleotide kinase (NEB). The treated mRNA was ligated with 3' RNA adaptor (Illumina) using truncated T4 RNA ligase 2 (NEB) and then with 5' RNA adaptor (Illumina). The adaptor-ligated mRNA was then reverse transcribed to first strand cDNAs, using a universal primer (Illumina) and Superscript II reverse transcriptase (Invitrogen), and then amplified for 12 cycles with Phusion DNA Polymerase. Fragments of 170 – 300 base-pair in size were purified using a 2% agarose gel and recovered.

### ***Sequencing base-calling, mapping, and SNP calling, and RNA-Seq data analysis***

Sequencing of exome and cDNA libraries was carried out on an Illumina GAIIx sequencer. Sequences of 75 x 2 paired-end reads for exome and 36 base-pair single reads for RNA-Seq were called from image files with the Illumina GApipeline and aligned to the rat reference genome (Baylor 3.4/rn4) using Extended Eland in CASAVA-1.8.1. An average of 40 million uniquely mapped exome reads and 7.8 million RNA-seq reads for each sample were retrieved and parsed with in-house Perl scripts to generate base coverage in WIG file format. SNPs from exome-seq reads were called with CASAVA-1.8.1 with default setting except with “—variantsNoCovCutoff” option to turn off high-coverage filtration of SNPs. The sequenced base counts at individual SNP locations for each sample were parsed from the mapped reads. RNA-Seq data analysis, including peak identification, quantification and normalization has been previously described (Zhou et al., 2011). The group comparisons of log transformed data between the P and NP rats were performed using t-tests, FDR q value was calculated for each P value using the Benjamini-Hochberg method. For gene ontology and functional annotation analysis, the genes that were significantly different in expression (FDR < 0.05) between the P and NP rat lines were analyzed with the Functional Annotation Tool of the DAVID Bioinformatics Resources 6.7, National Institute of Allergy and Infectious Diseases (NIAID), NIH (<http://david.abcc.ncifcrf.gov>).

### ***Sanger sequencing validation, genotyping, QTL analysis, and quantitative RT-PCR***

Nonsense and missense variants were validated by Sanger sequencing of PCR-amplified genomic DNA using specific primers and BigDye Terminator mix v3.1 (Applied Biosystems) and analyzed on an ABI 3730 or 3100 capillary sequencer. TaqMan assays on an ABI 7900 instrument were used for genotyping P, NP and Wistar rats. For QTL analysis, quantitative measures of ethanol consumption and preference

of all F2 rats were analyzed together with genotypes as predictor variables by ANOVA. For RT-PCR, first strand cDNA was reverse transcribed from mRNA with random priming using Superscript RT II (Invitrogen). Quantitative PCR was carried out with SYBR Green master mix (Applied Biosystems) on an ABI 7900 instrument. Relative gene expression level was calculated using the  $\Delta\Delta CT$  value. Expression differences were analyzed by one-way ANOVA. Combined P value was calculated using the Truncated Product Method (Zaykin et al., 2002).

### ***Western blots***

Fifty  $\mu\text{g}$  of total protein extracted from hippocampus of P and NP rats was separated on 4-12% Bis-Tris denaturing polyacrylamide gel together with the Novex Sharp protein standard and then dry-transferred to nitrocellulose membrane using the iBlot system (Invitrogen). Membranes were incubated with 32  $\mu\text{g}$  of a mouse monoclonal anti-mGluR2 N-terminal antibody (ab15672, Abcam) in 5% milk/TBST solution at room temperature for 7 hr, followed by incubation with 0.15  $\mu\text{g}$  of mouse anti-Gapdh antibody (MAB374, Millipore) at 4C for 40 min. 0.5  $\mu\text{l}$  of an goat anti-mouse IgG (A4415, SIGMA) conjugated with HRP was then incubated with blots at room temperature for 1 hr before chemiluminescent detection was performed.

### ***Field potential recording in brain slices***

Rats (2-3 month old) and mGluR<sup>+/+</sup> and <sup>-/-</sup> mice (10 wks old) were anesthetized and decapitated. Brains were blocked and mounted on the stage of a Leica BT1200S brain slicer in cold cutting solution, and sliced in coronal sections of 300-320  $\mu\text{m}$  thickness containing the dorsal hippocampus, or the striatum posterior to the head of the caudate nucleus. Slices were then placed on netting in a beaker filled with artificial cerebrospinal fluid (aCSF) at 32°C for 1 hour, after which the slice-containing beaker was moved to the bench top and allowed to cool to room temperature. Individual slices were moved to a Plexiglas recording chamber and constantly superfused with carbogen-bubbled aCSF at 30°C at a flow rate of  $\sim 2$  mL/min. Under visualization with a stereomicroscope, the tips of a twisted pair of Teflon-coated tungsten wires were placed into the slices in the white matter separating the cortex from the dorsolateral striatum, or in the middle third of the molecular layer of the dentate gyrus (DG) for afferent stimulation. A glass microelectrode ( $\sim 1$  MOhm tip resistance) filled with 0.9% NaCl was placed in the slices within  $\sim 300$   $\mu\text{m}$  of the stimulating electrode tips (in dorsolateral striatum or molecular layer middle third in DG) to record stimulus-evoked field potentials. Field potentials evoked at a rate of 0.033 Hz were amplified 1000 x using an Axoclamp 2A amplifier and a Warner Instruments DP-301 differential AC preamplifier, filtered at 1 Hz high-pass and 1KHz low-pass, and digitized at 20 KHz using a Digidata 1322A (Molecular Devices, Sunnyvale CA). Stimulus amplitude was set to evoke a population spike or fEPSP  $\sim 80\%$  of the maximum that could be induced. Data were stored, displayed and analyzed using pClamp v8.2 software (Molecular Devices). The fEPSP Slope in DG recordings was measured by a linear fit between cursors placed across the middle third of the initial negative-going component of the field potential. The PS amplitude in striatum was measured as the difference in values obtained from cursors placed at the onset (peak positivity) and negative peak of the negative-going field potential that occurs 4-8 msec post-stimulus. Once recording was initiated and a stable field potential obtained, the group II mGluR agonist LY379268 (200 nM) was applied to the slice for 5 min via whole-bath superfusion.

Following agonist application, superfusion was switched back to aCSF. To validate the involvement of group II mGluR in the agonist action, in some experiments the group II mGluR antagonist LY341495 was applied throughout the recording at a 1  $\mu$ M concentration, and agonist was applied as described above. The agonist effect was completely prevented in the presence of LY341495. For the graph in Figure 3, the fEPSP Slope or PS amplitude values in the 0-10 min range of the experiment were averaged and this average was used to set the baseline level of 100%. All subsequent values were then normalized to this average within each slice and means  $\pm$  SEM were calculated for all slices in the group and plotted as the percent of baseline value at each time point.

#### ***Alcohol self-administration in Wistar rats***

Male Wistar rats weighing 300-400 g at the outset of the experiment were housed on a reverse 12 h light/dark cycle. Food and water were available *ad libitum*. Experiments were conducted during the dark cycle. Rats were trained in operant conditioning chambers to self-administer 20% alcohol (v/v) in 30 min daily sessions on a fixed ratio 1 (FR-1) schedule of reinforcement, in which each response on the active lever resulted in delivery of 0.03 ml of fluid. Experiments were initiated after 14 days of training when response rates reached stability. Rats were injected intraperitoneal (i.p.) with vehicle or LY341495 (3 mg/kg), 30 min prior to 30 min sessions for five consecutive days.

#### ***Alcohol consumption and preference in Grm2<sup>-/-</sup> mice***

The *Grm2<sup>-/-</sup>* mice were generated on a CD1 background by homologous recombination as previously described (Linden et al., 2005). At the start of the experiment mice were 10 weeks old. The mGluR2<sup>+/+</sup> and mGluR2<sup>-/-</sup> mice were on a 12 hour on / 12 hour off dark/light cycle with food and water available *ad libitum*. Animals were single housed and trained to drink in a two-bottle choice procedure with one bottle containing water and the other containing increasing concentrations of alcohol (3, 6, 9, 11, 13, 15 and finally 17% v/v) providing a free choice situation. Alcohol and water intake were measured on Monday, Wednesday, and Friday, for 10 weeks. To measure the loss of righting reflex (LORR), mice were injected with a high dose of alcohol (4 g/kg intraperitoneal (i.p.)) then returned to their home cage until they exhibited LORR. LORR is defined as the inability to right from the supine position, and recovery was considered to be when the mouse was able to turn around on 4 paws 3 times in 1 min after being placed in the supine position on a v-shaped trough. LORR measurement was calculated by subtracting the time (in minutes) of onset of LORR from the time at recovery from LORR. To measure alcohol metabolism, mice were injected with 4 g/kg i.p. of alcohol. Tail blood was collected at either 10, 30, 60, 120, or 180 min post injection. Blood alcohol levels (BALs) were determined by a gas chromatograph system (Agilent Technologies, Fort Worth, TX, USA).
